# Supplementary material
Source: PubMed Central journal article supplement (PMC7830112)
Supplement: bc0c00644_si_001.pdf [file bc0c00644_si_001.pdf]

# Supporting Information

## One-pot synthesis of defined-length ssDNA for multi-scaffold DNA origami

Willem E. M. Noteborn<sup>†</sup>, Leoni Abendstein<sup>†</sup> & Thomas H. Sharp<sup>†,\*</sup>

<sup>†</sup>Department of Cell and Chemical Biology, Leiden University Medical Center, 2300 RC Leiden, The Netherlands

### AUTHOR INFORMATION

\*Corresponding Author: E-mail: t.sharp@lumc.nl. Tel: 0031-7152-69499

## **Materials**

M13mp18 was obtained from Bayou Biolabs/Tebu-Bio. pUC19 and pEGFP-C1 were synthesized in-house. Lambda DNA was purchased from Thermo Fisher Scientific. All staples and PCR primers were synthesized and purified using standard desalting procedures by Integrated DNA Technologies (IDT). Primers containing phosphate and phosphorothioate modifications were HPLC purified by IDT. Tris base, EDTA, MgCl<sub>2</sub>, PEG 8000, and NaCl were purchased from Sigma-Aldrich. T7 exonuclease, Lambda exonuclease, Apol-HF restriction endonuclease, proteinase K, Q5<sup>®</sup> High-Fidelity 2X Master Mix, and Monarch<sup>®</sup> PCR & DNA Cleanup Kit (5 µg) were obtained from NEB/BioLabs. AccuStart Taq DNA Polymerase HiFi was purchased from Quantabio. Amicon<sup>®</sup> Ultra 0.5 mL Centrifugal Filters (MWCO: 100 kDa) were obtained from Merck.

## **Polymerase chain reactions**

Double-stranded DNA production was performed using the Q5<sup>®</sup> High-Fidelity 2X Master Mix. The enzyme was used according to the manufacturer's specified buffer and protocol for standard PCR. Briefly, 25 ng of template was mixed with both primers (1 µM each), PCR master mix or individual PCR buffer and components (e.g. MgSO<sub>4</sub>, dNTPs), and H<sub>2</sub>O in a total volume of 50 µL. The annealing temperature for all reactions was 60°C. The PCR protocol using the Q5<sup>®</sup> enzyme consisted of a 30 s initial denaturation at 98°C, followed by 30 cycles of 10 s at 98°C, 30 s at 60°C, and 45 s per kilobase at 72°C. Afterwards, PCR reactions were evaluated using 0.8 – 1.0 % agarose gel electrophoresis or directly used for ssDNA production. Asymmetric PCR was performed in a similar way to the standard PCR protocol using AccuStart Taq DNA Polymerase HiFi and primer combinations that were specially designed for aPCR with a final concentration of 1 mM of sense primer and 20 nM of antisense primer.<sup>1</sup>

## **T7 exonuclease digestion**

Freshly made PCR reactions (50 µL each) were directly used for ssDNA generation without purification. To each reaction, 5 µL of NEB buffer 4 and 1 µL T7 exonuclease (10 units) was added and incubated overnight at 25°C. Afterwards, ssDNA was purified using a Monarch<sup>®</sup> PCR & DNA Cleanup Kit (5 µg DNA binding capacity), quantified using a Nanodrop 1000 spectrophotometer, and stored at -20°C. Alternatively, after digestion 1 µL of proteinase K solution (10 mg/mL) was added to the mixture and incubated for 30 min at 37°C to inactivate any DNA modifying enzyme. In this way, the ssDNA could directly be used in DNA origami folding in a one-pot fashion.

## **Lambda exonuclease digestion**

Lambda exonuclease-based digestion was performed in a similar fashion to the T7 exonuclease-based method. 5 µL of lambda exonuclease buffer and 1 µL (5 units) of lambda exonuclease were added to a PCR reaction (50 µL each) and incubated overnight at 37°C. Better digestion was obtained by first purifying the PCR product using a Monarch<sup>®</sup> PCR & DNA Cleanup Kit (5 µg DNA binding capacity). Afterwards, the reactions were purified again using the same protocol as with T7 exonuclease.

## **Restriction endonuclease digestions**

M13mp18 ssDNA (1 pmol) was combined with two oligonucleotides containing a complementary sequence to two Apol restriction sites (20 pmol each) in 50 µL of 1X NEB CutSmart<sup>®</sup> buffer (50 mM potassium acetate, 20 mM Tris-acetate, 10 mM magnesium

acetate, 100 µg/mL BSA, pH 7.9) and thermally annealed from 85°C to 25°C at a rate of 1°C per min in a thermal cycler. Afterwards, restriction enzyme ApoI-HF (1 µL, 20 units) was added and the mixture was incubated overnight at 37°C. Digestion was examined using 1 % agarose gel electrophoresis.

### **DNA origami folding and purification**

DNA origami folding solutions were prepared in PCR tubes by mixing the appropriate ssDNA scaffold (20 nM) with ssDNA staples (200 nM of each staple) in DNA origami folding buffer (20 mM Tris, 5 mM NaCl) supplemented with 20 mM MgCl<sub>2</sub> (31-DDH and 42-DDH were prepared using 25 mM MgCl<sub>2</sub>) in a total volume of 50 µL. DNA origami structures were thermally annealed in a Bio-Rad C1000 Touch™ Thermal Cycler using the following protocol: 80°C down to 76°C at a rate of 5 min/°C, 75°C down to 30°C at a rate of 13.75 min/0.5 °C, 29°C down to 20°C at a rate of 10 min/°C. Folded DNA origami were purified and concentrated using Amicon® Ultra 0.5 mL Centrifugal Filters (MWCO: 100 kDa) or using PEG precipitation.<sup>2</sup>

### **Agarose gel electrophoresis**

PCR products, ssDNA digestion products, and freshly folded DNA origami samples were loaded onto a 1 % agarose gel in 1× TAE buffer (40 mM Tris, 20 mM acetic acid, 1 mM EDTA) supplemented with 12 mM MgCl<sub>2</sub>. Gels were run on a BioRad Mini-PROTEAN Tetra Cell electrophoresis device at 4 °C for 1 h under a constant voltage of 100 V. Afterwards, gels were stained with GelRed® and imaged using a Bio-Rad's Gel Doc XR+ system.

### **Assessing heat degradation of ssDNA**

Lambda DNA was used to synthesise ssDNA of length 2,342 nt, 5,000 nt and 10,000 nt (Figure S9 and Table S14) before 20 nM solutions of each ssDNA was heated at either 40°C, 65°C, or 95°C in a thermal cycler. Samples were taken at specific time intervals of 15 min, 30 min, 1 h, 2 h, 4 h, and 24 h. Directly afterwards, the freshly drawn samples were stored at -20°C to stop further heat treatment until all samples from all time points could be analysed simultaneously on a 1 % agarose gel. For this, a 50 ng aliquot of each sample was loaded onto 1 % agarose gels and run for 1 h at 100 V. Afterwards, the gels were stained using GelRed® and visualized under UV light.

### **Electron microscopy and image analysis**

Five freshly prepared 50 µL folding reactions with a scaffold concentration of 20 nM were combined, purified and concentrated to a volume of 25 µL using an Amicon Ultra 0.5 ml centrifugal filter (MWCO: 100 kDa). A three-microliter aliquot was applied onto a freshly glow-discharged TEM grid (Cu, 200 Mesh) with a continuous carbon support film and incubated for 2 min. The sample was stained with a 2 % uranyl formate solution for 1 min. Imaging was performed on a Tecnai T12 BioTWIN operating at 120 kV. Micrographs were collected at a 68,000x magnification using an Eagle 4k x 4K CCD camera. Single-particle picking and class averaging was performed using the image processing software package EMAN2.<sup>3</sup>

## Supplemental Figures

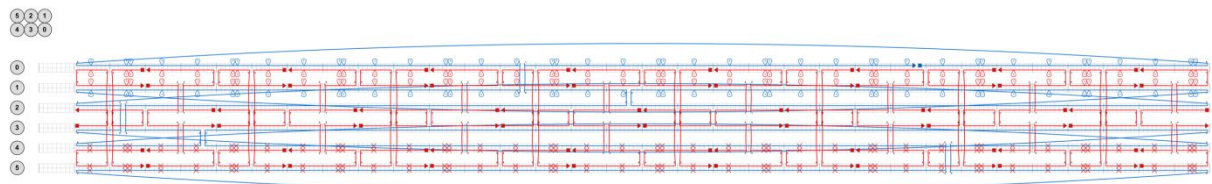

**Figure S1. Schematic design of the 38 nm toroid.** Grey circles represent DNA helices on the square lattice. Scaffold and staples are blue and red, respectively.

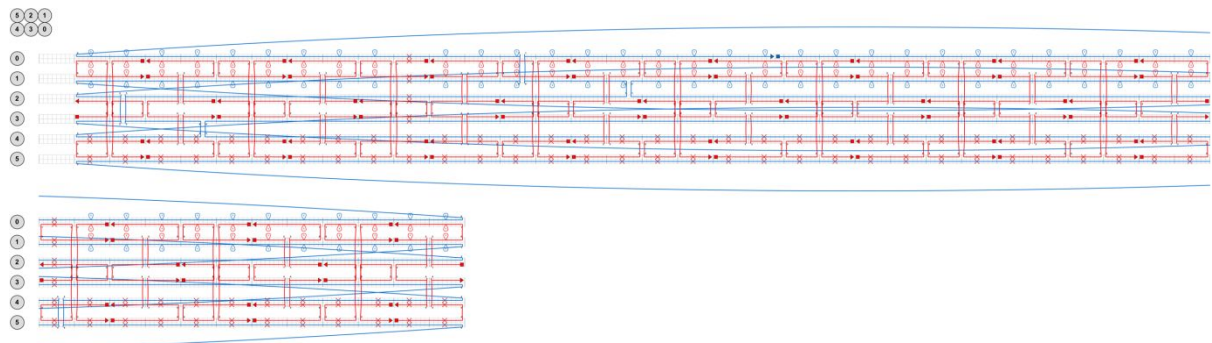

**Figure S2. Schematic design of the 49 nm toroid.** Grey circles represent DNA helices on the square lattice. Scaffold and staples are blue and red, respectively.

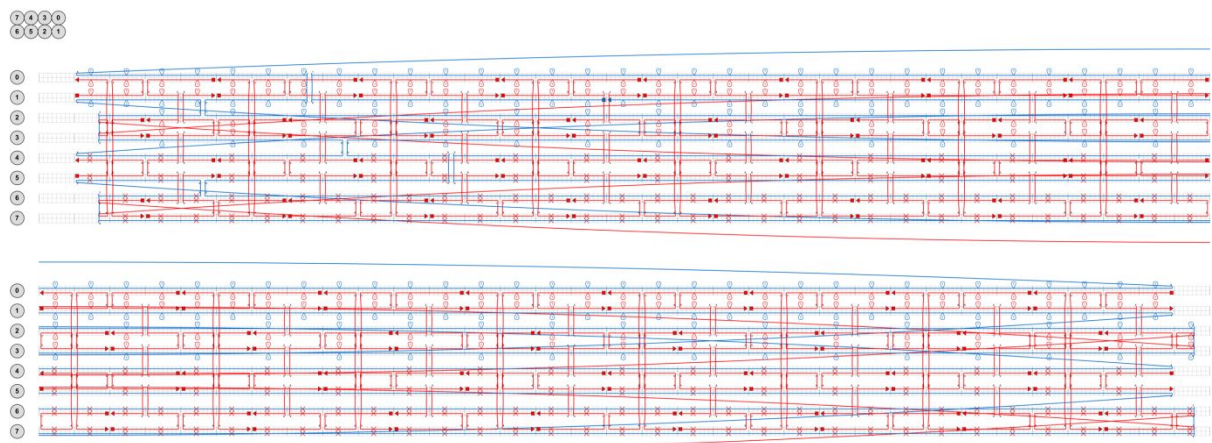

**Figure S3. Schematic design of the 62 nm toroid.** Grey circles represent DNA helices on the square lattice. Scaffold and staples are blue and red, respectively.

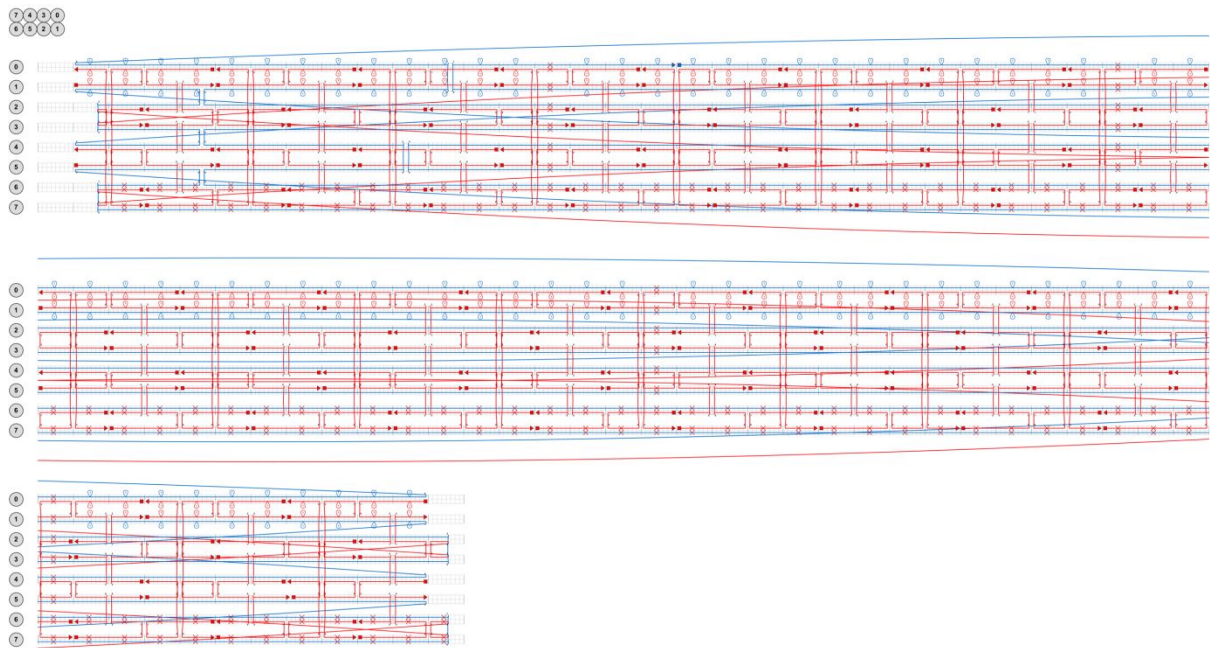

**Figure S4. Schematic design of the 74 nm toroid.** Grey circles represent DNA helices on the square lattice. Scaffold and staples are blue and red, respectively.

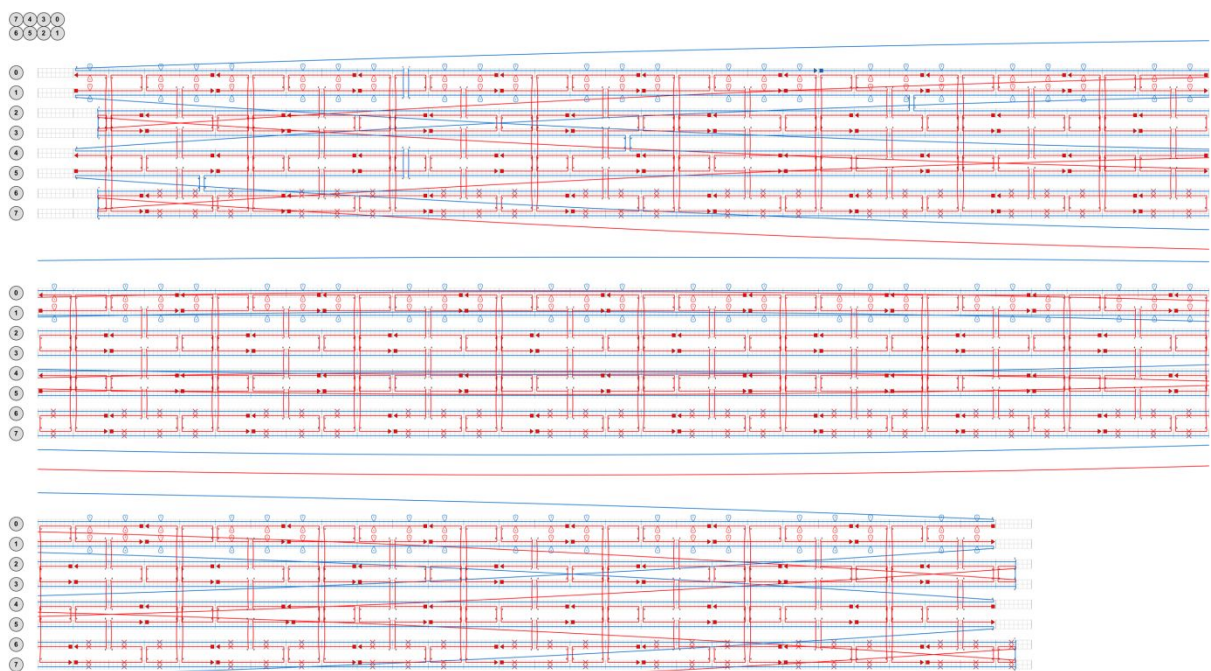

**Figure S5. Schematic design of the 90 nm toroid.** Grey circles represent DNA helices on the square lattice. Scaffold and staples are blue and red, respectively.

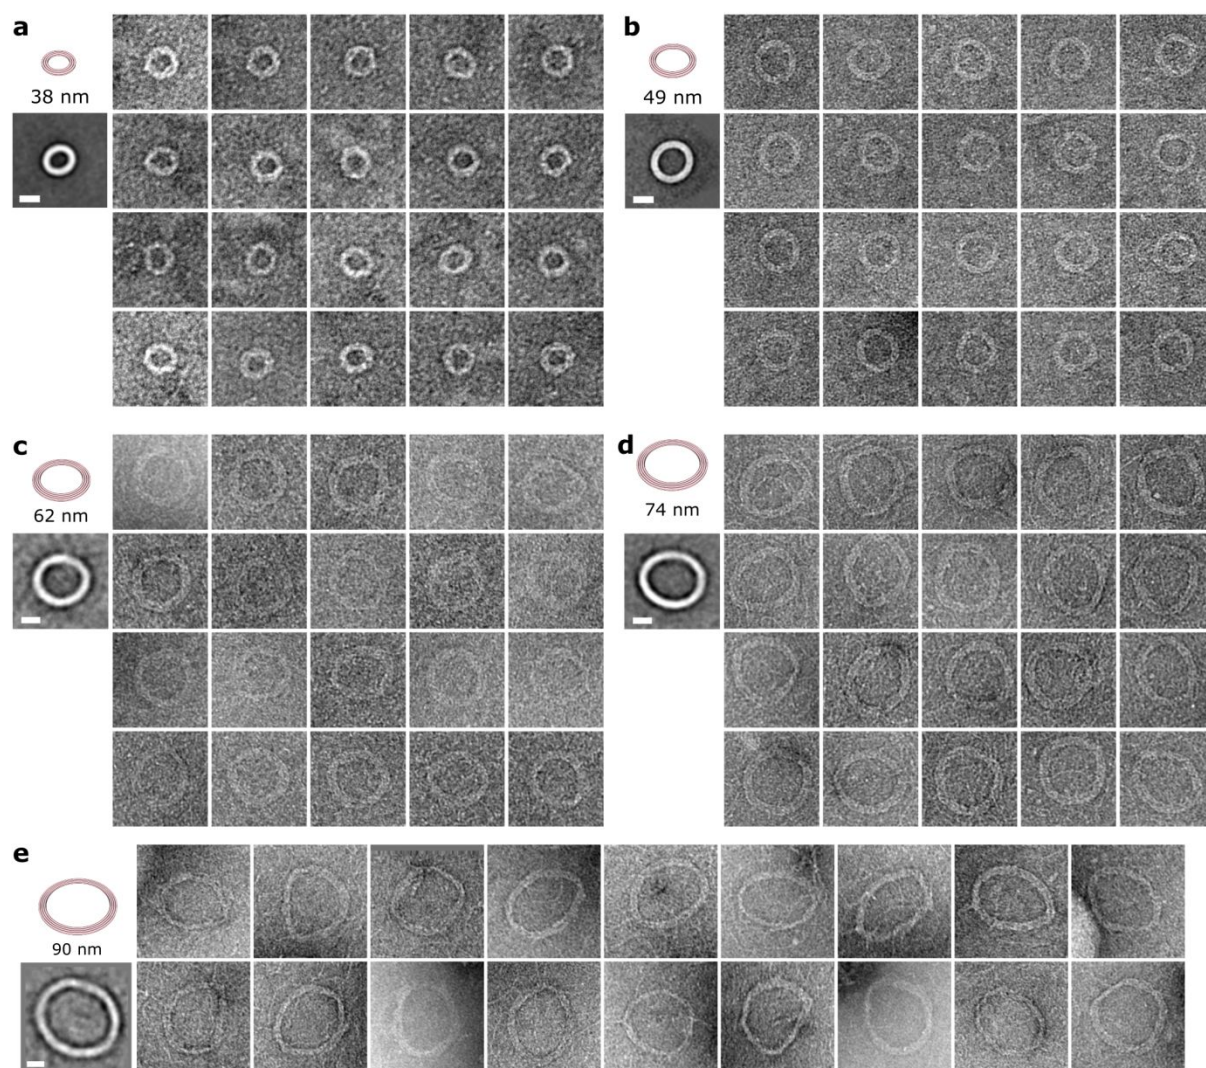

**Figure S6. Negative stain EM images of the toroid designs.** Computer designs, class averages and negative-stained individual toroids of diameter; (a) 38 nm, (b) 49 nm, (c) 62 nm, (d) 74 nm, (e) 90 nm. Scale bars are 25 nm for all panels.

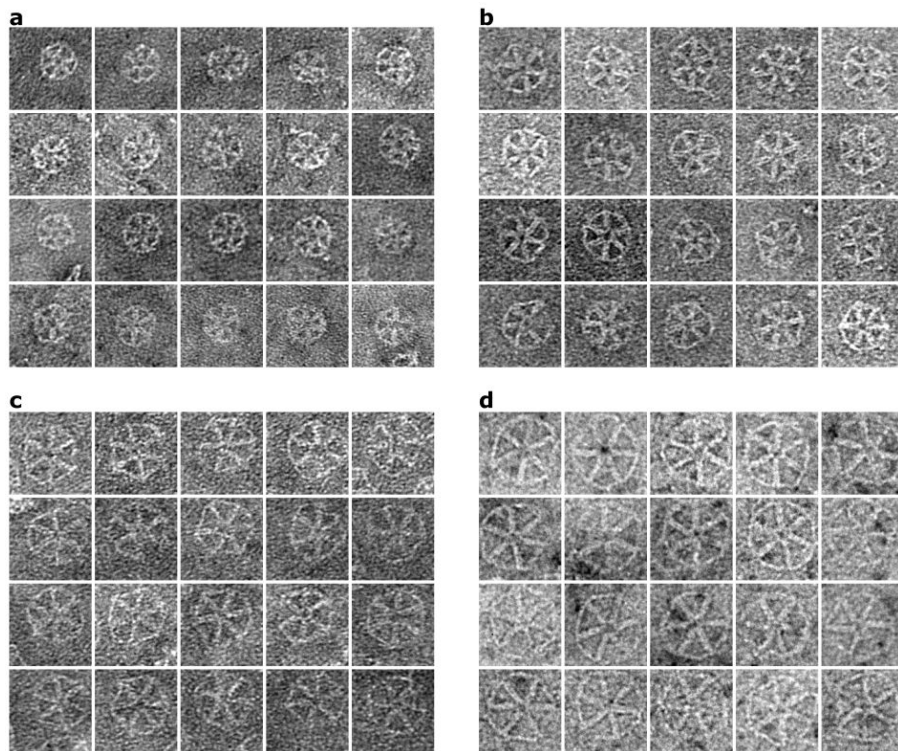

**Figure S7. Negative stain EM images of double-decker hexagon (DDH) designs. (a) 1229-DDH. (b) 1512-DDH. (c) 1872-DDH. (d) 2268-DDH. Each box has an edge length of 100 nm.**

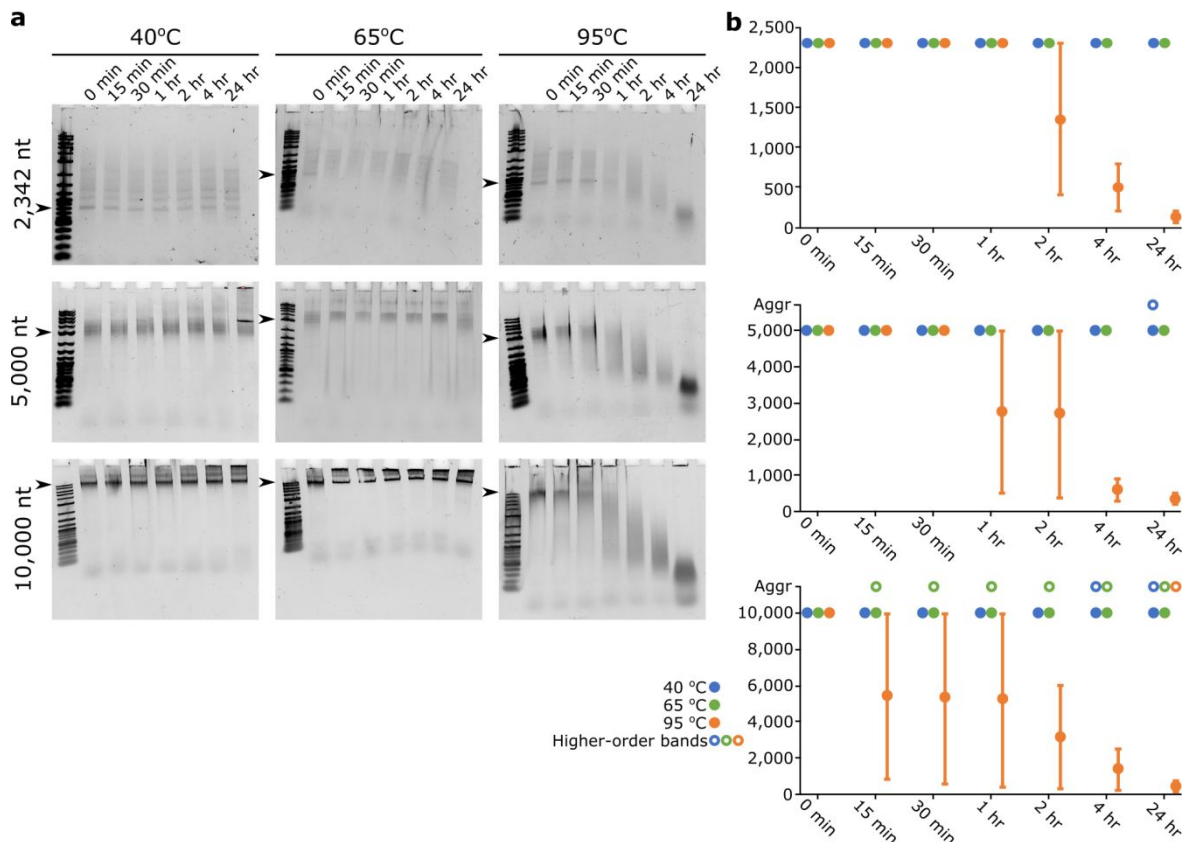

**Figure S8. Thermal degradation of ssDNA is proportional to length and temperature. (a) Incubation at 95 °C degrades ssDNA 10,000 in length within 15 min. (b) Thermal degradation**

of ssDNA is proportional to length. See Table S14 for primer sequences and template information.

Template DNA: pEGFP-C1

Lambda

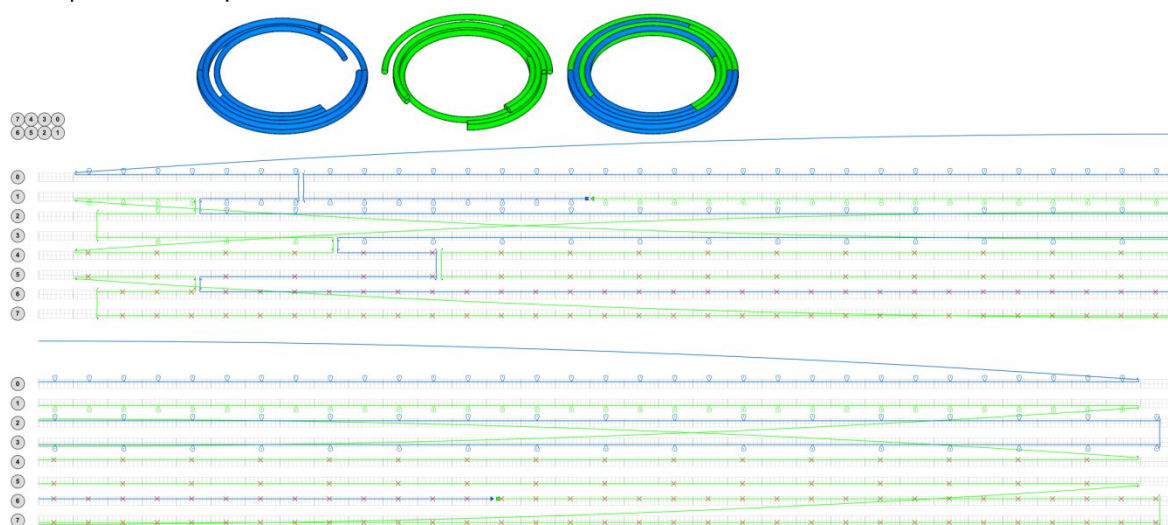

**Figure S9. Schematic design of the 62 nm toroid split into two scaffold strands using different template DNA.** Scaffold strands are blue and green. The route of each scaffold within the completed origami is shown at the top, along with the complete structure and the source of the template DNA. Grey circles represent DNA helices on the square lattice. Staple strands are not shown and follow the same scheme as Figure S3.

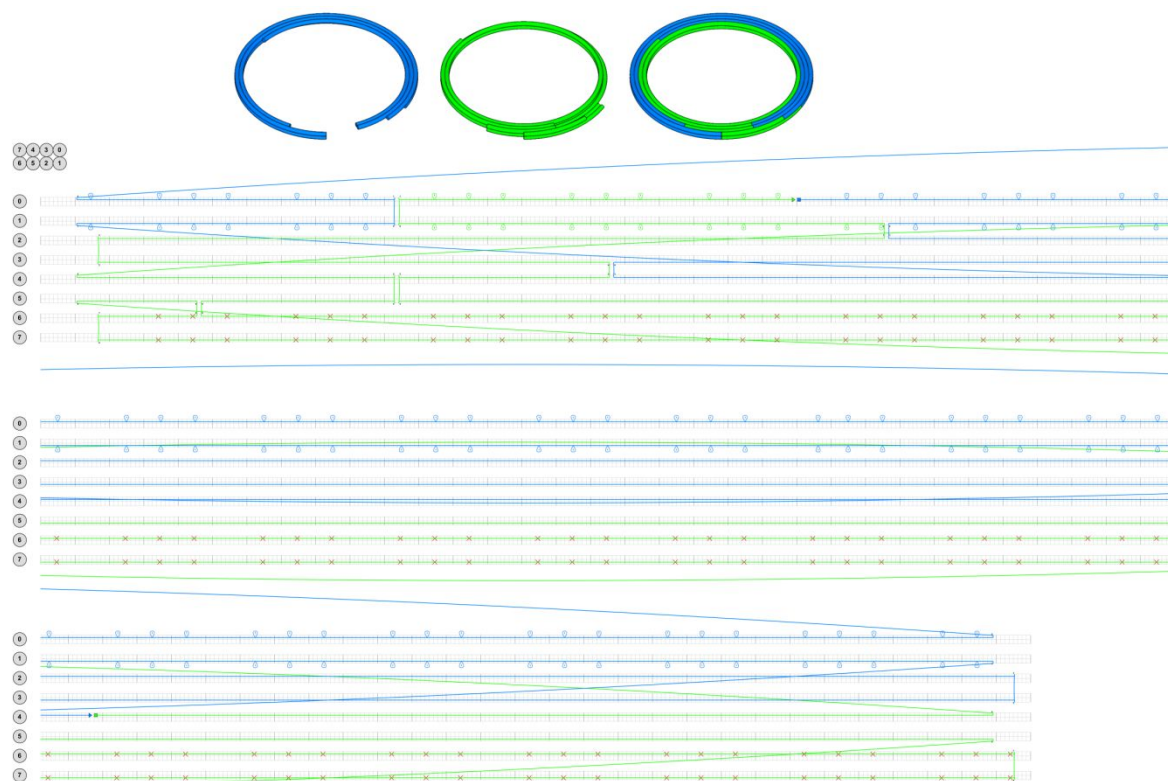

**Figure S10. Schematic designs of the 90 nm toroid split into two scaffold strands.** Scaffold strands are blue and green. The route of each scaffold within the completed origami is shown at the top, along with the complete structure. Grey circles represent DNA helices on the square lattice. Staple strands are not shown and follow the same scheme as Figure S5.



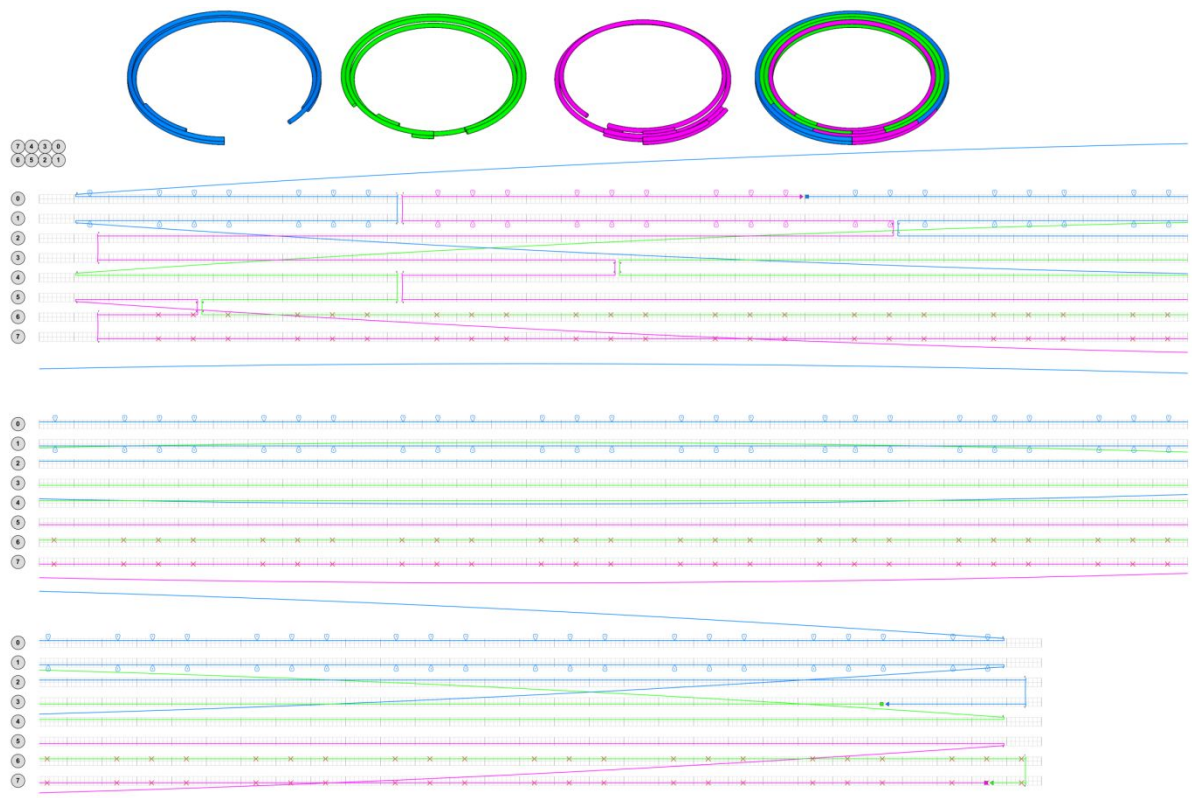

**Figure S11. Schematic designs of the 90 nm toroid split into three scaffold strands.** Scaffold strands are blue, green and purple. The route of each scaffold within the completed origami is shown at the top, along with the complete structure. Grey circles represent DNA helices on the square lattice. Staple strands are not shown and follow the same scheme as Figure S5.

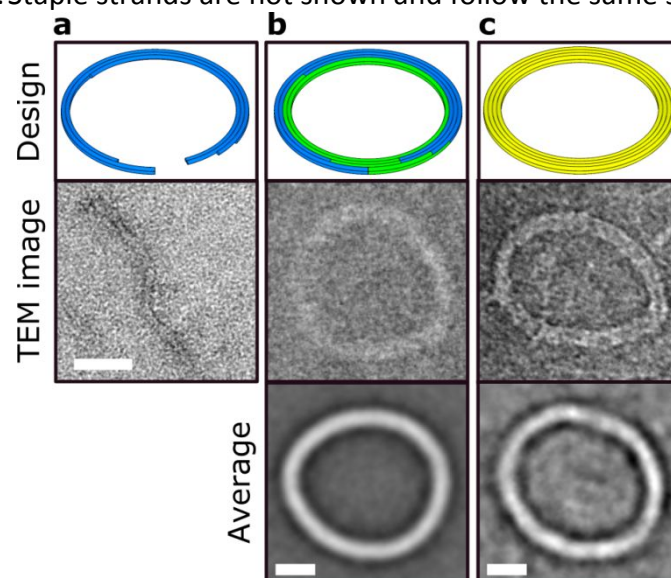

**Figure S12. TEM analysis of the 90 nm toroid formed from two scaffolds.** (a) Structure formed from half of the required scaffold showing the route of the scaffold within the completed origami design (blue; top) and a representative TEM image of the resulting amorphous structure. (b) Structure formed from both of the required scaffolds, showing the route of each scaffold (blue and green) within the completed origami design (top), a representative TEM image of the resulting toroid, and a class average of the structures

found in TEM. (c) Comparison with the 90 nm toroid formed from a single scaffold (yellow).  
Scale bars: a, 50 nm; b & c, 20 nm

## Supplemental Tables

**Table S1. Primer sequences for Figure 1b.** Template was M13mp18 ssDNA. Phosphorothioated nucleotides shown in bold.

*For PCR followed by T7 exonuclease digestion:*

|             |                             |
|-------------|-----------------------------|
| 1536_Fwd_PS | <b>GACGG</b> GTTGTTACTCGCTC |
| 1536_Rev    | GTTTCTCGTCAGGGCAAGC         |

**Table S2. Primer sequences for Figure 1c.** Template was M13mp18 ssDNA. Apol recognises the dsDNA sequence RAATTY (where R and Y are purine- and pyrimidine-containing bases, respectively), which are underlined, and the cleavage sites are indicated with ▼. Phosphorothioated nucleotides shown in bold and phosphate modification by /5Phos/.

*For restriction endonuclease digestion by Apol-HF:*

|                       |                                          |
|-----------------------|------------------------------------------|
| 5917/1332 nt primer 1 | AGAGTCAATAGTG▼ <u>AATTTATCAA</u> AATCATA |
| 5917/1332 nt primer 2 | ACAATCAATAGAA▼ <u>AATTCATATGG</u> TTTACC |

*For aPCR:*

|          |                       |
|----------|-----------------------|
| 1229_Fwd | GCACTGACCCCGTTAAACTTA |
| 1229_Rev | GACTTGCGGGAGGTTTTGAAG |

*For PCR followed by lambda exonuclease digestion:*

|               |                               |
|---------------|-------------------------------|
| 1229_Fwd_PS   | <b>GCACT</b> GACCCCGTTAAACTTA |
| 1229_Rev_Phos | /5Phos/GACTTGCGGGAGGTTTTGAAG  |

*For PCR followed by T7 exonuclease digestion:*

|             |                               |
|-------------|-------------------------------|
| 1229_Fwd_PS | <b>GCACT</b> GACCCCGTTAAACTTA |
| 1229_Rev    | GACTTGCGGGAGGTTTTGAAG         |

**Table S3. Scaffold sequences for the DDH designs.** Template was M13mp18 ssDNA. Primer locations are underlined and phosphorothioated nucleotides shown in bold.

1229 nt for the 1229-DDH

**gcact**gaccccggttaaaacttattaccagtacactcctgtatcatcaaaagccatgtatgacgcttactggaacggtaaattc agagactgcgctttccattctggctttaatgaggatttatttggttgtgaatatcaaggccaatcgctcgactgcctcaacc tccgtgcaatgctggcgccgctctgggtgggttctgggtggcgctctgaggggtggctctgaggggtggcgttctgagg gttggcgctctgagggagggcggttccggtgggtggctctgggttccggtgattttgattatgaaaagatggcaaacgctaataag ggggctatgaccgaaaatgccgatgaaaaacgctacagctctgacgctaaaggcaacttgattctgctgctactgattacgg tgctgctatcgatggtttcattgggtgacgtttccggccttgctaattggtaattgggtgctactgggtgattttgctggctcctaatt cccaaatggctcaagtcgggtgacgggtgataattcacctttaatgaataatttccgtcaataattaccttccctccctcaatcg gttgaatgtcgcccttttgtctttggcgctggtaaacatatagaattttctattgattgtgacaaaataaacttattccggtgg tgcctttggcgtttctttatgatgttggccacctttatgtatgtattttctacgtttgctaacatactgctgaataaggagctt aatcatgcccagttcttttgggtatttccggtatttatttgggttctcctcgtttcctctggttaactttgctcgtatctgctta cttttcttaaaaagggttcggtaagatagctatttgcatttcttctgctcttattattgggcttaactcaattctt gtgggttatctctctgatattagcgtcaattaccctctgactttggttcagggtgttcagtttaattctcccgtcctaagcgt tccctgtttttatggtattctctctgtaaaggctgctattttcatttttgacgttaaacaaaaaatcgtttcttatttggatt gggataaataatattgctgtttattttgtaactggcaaataggctctgaaagacgctcgttagcgttggttaagattcagga taaaattgtagctgggtgcaaaaatagcaactaatcttgatttaaggcttcaaaaacctcccgaagtc

1512 nt for the 1512-DDH

**gcctc**aacctcctgtcaatgctggcgcgctctgggtgggtggttctgggtggcgctctgaggggtgggtgctctgaggggtggcg gttctgaggggtggcgctctgagggagggcggttccggtgggtgctctggttccggtgattttgattatgaaaagatggcaaac gctaataagggggctatgaccgaaaatgccgatgaaaaacgctacagctctgacgctaaaggcaacttgattctgctgctac tgattacgggtgctgctatcgatggtttcattgggtgacgtttccggccttgctaattggtaattgggtgctactgggtgattttgctg gctctaattcccaatggctcaagtcgggtgacgggtgataattcacctttaatgaataatttccgtcaataattaccttccctc cctcaatcggttgaatgtcgcccttttgtctttggcgctggtaaacatatagaattttctattgattgtgacaaaataaactt attccggtggtgcttttgcgtttcttttataatgttggccacctttatgtatgtattttctacgtttgctaacatactgctgaata aggagcttaactcatgcoagttcttttgggtatttccggtatttatttgggttccctcgtttcctctggttaactttgctcggct atctgcttacttttcttaaaaagggttcggtaagatagctatttgcatttcttctgctcttattatttgggcttaac tcaattcttgggtttatctctctgatattagcgtcaattaccctctgactttggttcagggtgttcagtttaattctcccgtc taatgoccttccctgtttttatggtattctctctgtaaaggctgctattttcatttttgacgttaaacaaaaaatcgtttctt atttggattgggataaataatattgctgtttattttgtaactggcaaataggctctgaaagacgctcgttagcgttggttaa gattcaggataaaaattgtagctgggtgcaaaaatagcaactaatcttgatttaaggcttcaaaaacctcccgaagtcgggaggt

tcgctaaaacgcctcgcttcttagaataccggataagccttctataatctgatttgcttgctattgggcgcggaatgattcc  
tacgatgaaaataaaaacggcttgcttctcgcgatgagtgccgacttggttaataaccgcttcttggaatgataaggaaag  
acagccgattattgattgggttctacatgctcgtgaaattaggatgggataatatttttcttggtcaggacttatctattggtg  
ataaacaggcgcttctgcattagctgaacatggtgttattgctcgtcgtcggacagaattactttaccttttgctgggtact  
ttatatctcttattactggctcgaaaatgcctctgcctaaattacatggttgccgcttgtaaaataggcgattctcaattaag  
ccctactgttgagcgttg

**1872 nt for the 1872-DDH**

ctttgccttgctgtatgatttattggatgtaatgctactactatttagtagaattgatgccaccttttcagctcgccccc  
aatgaaaatatagctaaacagggtattgaccatttgcaaatgtatctaattggtcaaactaaatctactcgttcgcagaattg  
ggaatcaactgttatatggaatgaaacttccagacaccgtacttttagttgcatatttaaaacatggtgagctacagcattata  
ttcagcaattaagctctaagccatccgcaaaaatgacctcttatcaaaaggagcaattaaaggactctctaactcctgacctg  
ttggagtttgcttccggtctggttgccttgaagctcgaattaaaacgcgatatttgaagcttttcgggcttctcttaactc  
ttttgatgcaatccgcttctgcttctgactataatagtcagggtaaacagcctgatttttgatttatggctattctcgtttctg  
aactgtttaaagcatttgaggggattcaatgaatatttatgacgattccgcagctattggacgctatccagctcaaacatttt  
actattaccocctctgcaaaaacttctttgcaaaagcctctcgtatatttgggtttttatcgtcgtctggtaaacgaggggta  
tgatagtggtgcttactatgcctcgttaattccttttggcggtatgatatcgcattagttgaatgtgggtattcctaaatctc  
aactgatgaatctttctacctgtaataatggttctcgttagttcgttttattaacgtagatttttcttcccaacgctcctgac  
tggataatgagccagttcttaaaatcgcataaggtaattcaaatgattaaagttgaaattaaaccatctcaagcccaattt  
actactcgttctgggttctcgtcagggcaagccttatcactgaatgagcagctttgttaacgctatttgggtaaatgaata  
tccggttctgtcaagattactcttgatgaaggtcagccagcctatgcgctggctgtacacgcttcatctgctcctttca  
aagttggcagttcgggttcccttatgattgaccgctctgcgctcgttccggctaagtaacatggagcaggtcgcggatttcga  
cacaatttatcaggcgatgatacaaatctcggttgtactttggttccgctgggtataatcgcctgggggcaagatgagtggt  
tttagtgattcttttgcctcttctgcttttaggttgggtcctcgtagtgccattacgtattttaccggttaatggaaactt  
cctcatgaaaaagtcttttagtctcaaacgctctgtagccgttgctaccctcgttccgatgctgtctttcgcctgctgaggggtg  
acgatcccgcaaaagcggcctttaactcctgcaagcctcagcagccgaatatacgggtatgctggggtgaggttgggtgct  
attgtcggcgcaactatcgggtatcaagcgtgtttaagaaatcaccctcgaaagcaagctgataaacccgatacaattaaaggctc  
cttttggagcctttttttggagattttcaacgtgaaaaaatattattcgcgaattccttttagttgttctttctattctcac  
tccgctgaaactgttgaaagttggttagcaaaatcccatacagaaaattcattactaacgtctggaaagacgcaaaaacttt  
agatcgttaacgtaactatgagggctgtcgtggaatgctacagggcgtgtgagttgtactgggtgacgaaactcagtggttacg  
gtacatgggttctctattgggcttgctatccctgaaaatgaggggtg

**2268 nt for the 2268-DDH**

ccctgagcttaccacaacttaatgccttgcagcacatccccctttcgcagctggcgtaatagcgaagaggcccgcaccgatc  
gcccctcccacagttgcccagcctgaatggcgaatggcgtttgctggtttccggcaccagaagcgggtgccggaagcgtgg  
ctggagtgcgacttctcctgaggccgatactgctcgtcgtccccctcaaacctggcagatgcacgggttacgatgcgcccactacac  
caacgtgacctatcccattacgggtcaatccgcccgtttgttcccacgggagaatccgacgggttgttactcgtcacatttaag  
ttgatgaaagctggctacaggaaggccagacgcaatatttttgatggcgttccctattggttaaaaaatgagctgatttaac  
aaaaatttaatgcaatttttaacaaaatattaacgtttacaatttaaatattgcttatacaatcttccctgtttttggggctt  
ttctgattatcaaccgggtacatatgattgacatgctagttttacgattaccggttcatcgattctcttgtttgctccagact  
ctcaggaatgacctgatagcctttgtagatctctcaaaaatagctaccctctcggcattaaatttatcagctagaacgggtg  
aatatcatattgagttgatttgactgtctcggcctttctcacccttttgaactctttacctacacattactcagccattgca  
tttaaaatataatgagggttctaaaaatttttatccttgcgttgaaataaaaggcttctcccgcaaaagtattacagggtcataa  
tgtttttggtacaaccgatattagctttatgctctgaggctttattgcttaattttgctaaattctttgccttgccgtatgatt  
tattggatgtaatgctactactatttagtagaattgatgccaccttttcagctcgcgccccaaatgaaaatataagctaaacag  
gttattgaccattttgcgaaatgtatctaattggtcaaactaaaatctactcgttcgcagaattgggaatcaactgttatatggaa  
tgaaacttccagacaccgtacttttagttgcatattttaaacaatggtgagctacagcattatattcagcaattaagctctaagc  
catccgcaaaaatgacctcttatcaaaaggagcaattaaaggactctctaactcctgacctgttggagtttgcttccggctg  
gttctgctttgaagctcgaattaaacgcgatatttgaagcttttcgggcttctccttaactctttttgatgcaatccgctttgc  
ttctgactataatagtcagggtaaaagacctgatttttgatttatgggtcattctcgtttttctgaaactgtttaaagcatttgagg  
gggattcaatgaatatttatgacgattccgcagctattggacgctatccagctcaaacattttactattaccocctctggcaaa  
acttcttttgcaaaagcctctcgtctattttgggtttttatcgtcgtctggttaaacgaggggtatgatagtggtgctcttactat  
gcctcgtaaattccttttggcggttatgtatctgcattagttgaatgtgggtattcctaaatctcaactgatgaatctttctacct  
gtaataatgttggttccgttagttcgttttattaaacgtagatttttctcccacgctcctgactgggtataatgagccagttctt  
aaaatgcgataaggttaattcacaatgattaaagttgaaattaaaccatctcaagcccaatttactactcgttctgggtttct  
cgtcagggcaagccttattcactgaatgagcagctttgttacggtgatttgggtaatgaatataccggttctgtcaagattac  
tcttgatgaaggtcagccagcctatgcgctggctgtacacgcttcatctgctctttcaagttgggtcagttcgggttccc  
ttatgatgaccgtctgcgctcgttccggcctaagtaacatggagcaggtcgggatttcgacacaatttatcaggcgatgat  
acaaatcctcgttgtactttgtttcgcgcttgggtataatcgttgggggtcaagatgagtggttttagtgattcttttgcctc  
tttctgttttaggttgggtccttctgtagtggcattacgtattttaccggtttaaaggaaacttctcatgaaaaagtcttttagt  
cctcaaaagcctctgtagccgttgctac

**Table S4. Staple sequences for the 1229-DDH design.**

GAAGCTTTTTCCTTTTAAAGATTTCATATGGTTTTTTTTTACCAGCGCGCACCA  
CAGCCTTTTATATTTTAAATAAGAAACGTTTTTATTTTTTGTTCACACA  
CCAGTTACAACAATAGCTAT  
CCAATAACCGAGAAGGAATAA  
AGAATTTTTTGTAGTTAAGCGAGCAAGAACTTTTTAATGAAATAGAATAAA  
AATAGTTTTTTCAGCCTTTACACATAAAAAATTTTTGGGAAGCGCAGAATTA

TAACGTCAAAGAGAGATAA  
 CAAAGAAAGAATACCCATCAGA  
 ACTGATTTTTACACCCCTGAAGGGTAATTGAGTTTTTCGCTAATATCAATGAA  
 ATCCTTTTTTCATTAAGCCCTCAGAGCCGCTTTTTACCAGAACCCCGCCG  
 TTAGACAAACATTCCGCGGA  
 AAACGTTTTTTAGAAAATACGGCAACATATATTTTTTAAAGAAACGCGAATAAGTTATTTTTTTTTGTCCACAGATAGC  
 GGTTCAGTATATTACGAGGCA  
 CCAGCTTTTTATTGACAGGAGGTGACAGCAGTTTTTTTTGGCCTTGATAAAATA  
 CGGAATTTTTCCGCTCCCTCAGACTGTAGCTTTTTTGCCTTTTCATGGTCAT  
 ACCACAGAGCGAACCCAGAG  
 GTTTTGAAAGGTATACATCCATC  
 AGCCCTTTTTCTTATTAGCTTTTTTCATAATCTTTTTTAAATCACCAGCCAC  
 CGGCATAAAGTTTCAATTTTTTC  
 TATTGTTTTTACGGAAATTAGTGAATTATCATTTTTTCCGTCACCGATTGGGA  
 AGGGAACCACGAAAGACGGGAA  
 CGAATTTTTTAAAGTTACCAGGAAACGCAATTTTTTAATAACGGAACGGCATGATTTTTTTAAGACTCCTTGTAGC  
 AAAAGTAAGCAATCAATAGAAA  
 GAACTTTTTTCATCGATAGCAGTAGCGACAGTTTTTAATCAAGTTTCCCTCAGAACCCTTTTTGCCACCCCTCACGCAGT  
 CCGGAAACGTCCAGTGCCGAGC  
 TTACCTTTTTATTAGCAAGGGTCTTTCCAGATTTTTGCCTAATTTGCTTACC  
 CAAAGCAAAAATCACCAGTA  
 ATTAGTTTTTAGCCAGCAAAAGGGCGACATTTTTTTCAACCGATTGGGTAAA  
 CTTGAGTAATCAGCACCAGCCAT  
 CAGAGCCGCCAGCCTTTAGCGT  
 CTCTGTTTTTAATTTACCGTCATACATGGCTTTTTTTTTGATGATAGGTAATAAGTTTTTTTTTAAACGGGGTACCAAT  
 AGAATGGAAAGGAGCCACCACC  
 AGAGAAAGCGTTCCAGTGAATA  
 TCCCATGTACTCAGGAGATCCA

**Table S5. Staple sequences for the 1512-DDH design.**

CGTTTTTATTTTTTTTTTCATCGTAGGTAGACGGGAGATTTTTATTAAGTAA  
 AACATGTAATTTTTTTTTTAGGCAGAGGCCAGTAATAAGTTTTTAGAATATAAA  
 ATCGGCTGTCTTTTTTTTTCTTATCAGGGTATTAACCTTTTTTCAAGTACCGC  
 ATTCTGTCCAGTTTTTACGACGACAAGTTCAGCTAATTTTTTGCAGAACCGC  
 AACAAATAGATATTTTTAGTCTGAACATATCCCATCCTTTTTTAATTTACGA  
 TAGCCCTTTATTTTTTTAGCGTTTTGAGGCCGAAACTTTTTGTACCAATG  
 GCGTCTTTCCATTTTTGAGCCTAATTAATCCCAATCCATTTTTAATAAGAAAACCAGCCTTTACATTTTTGAGAGAATAA  
 TAGCAGCACCCTTTTTTAATCAGTAGAAGTTGCTTTTTTTTTAGCGTCAGA  
 AAAGGTGAATTTTTTTATCACCAGTCAATTTTTTGTTTTTTCACAATCAAT  
 TATGGTTTACCTTTTTTAGCGCCAAAGGACATTCAACCTTTTTTGATTGAGGGA  
 CACAAGAATTGTTTTTAGTTAAGCCCTAGCTATCTTATTTTTCCGAAGCCCT  
 CAAGCAAAATCATTTTTGATATAGAAGTTAGCGAACCTTTTTTCCGACTTGCTGCTATTTTTGCTTTTTTACCAGCTAC  
 TAAGACTCCTTTTTTTTTTATACGAGTGGTGGCAACATTTTTTATAAAGAAATTAGAGCCAGCTTTTTTAAATCACC  
 CTGGCATGATAGGAGGTTGAGGCCAACGCTCACCCAAAAGAA  
 GAAACGCAATATTTTTATAACGGAATAACAGTAGGGCTTTTTTTAATTGAGA  
 AGTAAGCAGATTTTTTAGCCGAACAAGTAATTGAGCGTTTTTCTAATATCAG  
 TACATAAAAATGTTAGCAAACGTAGAGAAAATTTAAAAATACA  
 CATTTGGGAACGCAAAGACACCACGGAATAACCGACTTGAGC  
 CACCGAACCATTTTTGAGCCACCACGAAACCGCCACCTTTTTCTCAGAGCCAAGAGCCGCGCTTTTTTACGATTGAC  
 TAATCAAAAATGTAGCACCATTACCATTAGCACCATCTTTTCA  
 CACCCCTACGGAACCGCCTCCCTCAACATTAACAGAGCCGC  
 CCACCACCCACCCCTCAGAGCCGCTCGAGCATTTACCAGAA  
 GAGGCGTTGCTTATCCGGTATTCTAGAACTTCCAAAGAACGC  
 AGATTAGTGGGAGGTTTTGAAGCCAAATAAAGAATTAATCA  
 GCTAACGAAATTTTTATCCTGAATCGAATCCGACATTACCAAC  
 TATTATTTTGCCAGTTACAAAATAAGGGCACAAAAACAGCCA  
 GAAAATAGGATTTTTTGTAAACGTAACCAGAGATCAAAAAT  
 CCCAATAGCATAAAAACAGGGAAGCGCATAATCATTACCGCG  
 CATATTTAACAACGCCACTCATCGAGAAACAAGCAAGCATCGC  
 GACAAAAGGTAAAGTAGCATGTAGAAACCAATCAATAGTACC  
 TCGGCATTTTCGGTCACTGTAGCGCTTTTCATTATCCCTGT  
 CACGGAAATTTATTCATTGGGAAGGTAATAATTGATCGAAAAC  
 AAACAATGAAATAGCAAAAATAATAAGAGCAAGAATTCAGAA  
 ACCAGAAGGAAACCGAGCACCCTGAACAAAGTCAGAGGAGTT

**Table S6. Staple sequences for the 1872-DDH design.**

AGCGAAAAGACATTTTTGCATCGGAACCTGACCTTCATCTTTTTAAGAGTAATC  
 TCGTCACCAGTTTTTTACAACTACATAGTTAGCGTATTTTTACGATCTAAA  
 AACTGAGTTAGGCCGCTTT  
 TTCGGTCGTCGCCCACGCATAACGGTAAAAT  
 CGCCGACAATGTTTTTACAACAACCCTGAGGCTTGCTTTTTAGGGAGTTAA  
 AATTTCTGTATTTTTTGGGATTTTGGAGAATAGAAATTTTTGGAACAATA  
 TTAGTAAATGAATTTCTTAA  
 TATCGGTTCTCCAAAAGGAGCCTAAGAATAC  
 TGAAAATCTCCTTTTTAAAAAAGGTATCAGCTTGCTTTTTTTTCGAGGTG  
 TGTCTGGAAGTTTTTTTCATTCCATGAACCAGACCGTTTTTGAAGCAAAC  
 TTTTTTAAATAATAATTTTTTTCACGTAAGG  
 GATTTGTATCATTTTTTTCGCTGATATACTTAGCCGTTTTTAACGAGGCGCAACTTTGAAAGTTTTTAGGACAGATG  
 GCTTAATTTTCATTTTTGCGGATGAACAAAGT  
 ATTGCTCCTTTTTTTTGATAAGAGGGCTGAATATAATTTTTTGCTGTAGCT  
 TTTACCTGACTTTTTTATTATAGTCTTTGCAAAAGATTTTTAGTTTTGCCA  
 GAATGACCATATAGAGAGTACCTTTACCAAC  
 CCCCCATCGTCATAAAATTTTCGCGACCTG  
 ATAGCGTCCAATTTTTTACTGCGGAAAATGCTTTAAATTTTTTCAGTTCAGAA  
 TGAGATGGTTTAAATGTTTAGACTGGGAGGG  
 CACCAGAACGATTTTTGTAGTAAATTTATGTGAATTTTTTCTTATGCGA  
 ACGAGAAATCAGTGAATAAGGCTGGGAACCG  
 ACTAAAGACTTTTTTTTTTCATGAGGCCACTACGAAGTTTTTGCACCAACCTACTCATCTTTGTTTTTACCCCCAGCG  
 CGGCTACAGAAGACCAGGCGCATAGGCTGGCGAGGGTAGCAA  
 AATGCAGATACTTTTTATAACGCCAAATCATAACCTTTTTTCCGTTTACCAGAGAGGAAGCCCTTTTTGAAAGACTTC  
 TAGGAATACCAGGCAAGGCAAGCCACCTCCAGTTGAGATT  
 ACATTCAACTTAAATCATA  
 ATTACAGGTAGTTTTTAAAGATTCATATTTTCAGGGATTTTTTAGCAAGCCC  
 TTACCCAAATCGTTAATAAA  
 GACGTTGGGAATTTTTGAAAAATCTACAACGTAACAATTTTTAGCTGCTCAT  
 GCAACACTAAGGAATTACGAGGCACATTATA  
 CCAGTCAGTTTTTAAAGAACTGGCTTAGTAAGA  
 GGATTGCATCAAACCAAAATAGCGAGAGGCTAGAAGCAAAGC  
 AAAAAGATTAACGACGATAA  
 TAGATTTAGTTTTTTTTGACCATTAGGCTATATTTTCTTTTTATTTGGGGCGAGTAGTAGCATTTTTTTAACATCCAA  
 TTCCCAATTCTTTTAATTCGAGCTTCAAAGCATAACAGTTGA  
 TGCGAACGAGAAATATCGCG  
 CCTGTTAATACATTTTCGCAAATGCAGTTTC  
 AGCGGAGTCTAAACAACCTTTCAAGTCAATAA  
 CTACTAATCGAGCTGAAAAGGTGGCACAGAC  
 AGCCCTCAACGCCTGTAGCATTCCATCAATT  
 ACGTAATGAAGTTTCCATTAACGCGATATA  
 ACTAAAACAAAACGAAAGAGGCAATTAATTG  
 ACAACGGAATTATACCAAGCGCGAGCTTAGA  
 CTCCATGTAATTTGTGTGAAAATCCATTGAAT  
 AACTGACCAGACGGTCAATCATAATGCCCTG  
 CTTTGAGGAACGGTGTACGG  
 GAACCCATGTACCGTATGCGGGATCGTACCCCTCAGCAATAG  
 TGTCTGCTTTCCAGACGACAGCTTGATACCGATAGTTGGTTT  
 AATTGCGAATATGCAACTAAAGTACGGCAACA  
 AGGTCAGGATAATCAAAAATCAGGTCAACGA  
 GGTAATAGTAAATTTCACTTTAATCGGGCT  
 CTAACGGAACAACATTTTGACAAGAACCAGGATTTCAACGAA

**Table S7. Staple sequences for the 2268-DDH design.**

AAGAACTGGCTTTTTTTCATTATACCAAGCGAACCAGATTTTTCCGGAAGCAA  
 TACGTAATGCCTTTTTACTACGAAGGCACTAAAACACTTTTTTCATCTTTGA  
 CCACATTTCTCATCAGTTGAGATTACACCAGA  
 ACGAGTAGCTTGCCCTGACGAGAATAGGAATA  
 AACTAATGCAGGTAGAAAGA  
 CTGCTCATTCATTTTTGTGAATAAGGTAAATGGGCTTTTTTTGAGATGGTT  
 ATTTGTATCATTTTTTCGCTGATAAACTTAGCCGGATTTTTACGAGGCGCA  
 CCTCGTTTTAGTAAGAGCAACACTGCGCATAG  
 GCTGGCTGACGGTGTACAGACCAGATCATAAC  
 ACCAGACGACTTACGAGGCA  
 ACTTTGAAAGATTTTTTGACAGATGAACCTTCATCAATTTTTGAGTAATCTT  
 GGATAGGTCACTTTTTGTGGTGTAGATTTTGTAAATTTTTTATTCGCATTA  
 TCAATCATAAGGAACAACCGCGGATTTGTCGG

GACCGTAATGGTAACAACCC  
 CTGGATAGCGTTTTTTC AATACTGCGAAAACGAGAATTTTTTGACCATAAACATCAAAAAGATTTTTTTAAGAGGAA  
 AATAGTAAAAAGAAGTTTTGCCACCTGTAGC  
 CAGCTTTCATTTCGCGTCTGGCCTTGAGGGGT  
 AATGTTTAGAAGGCTTTTGC  
 ATAGGAACGCCTTTTTATCAAAAATAATCAACATTAATTTTTATGTGAGCGA  
 ACAAGAGAATCTTTTTGATGAACGGTATGCAATGCCTTTTTGAGTAATGTG  
 TTGTTAAATCAGGTCATGCCTGAGAGTCTAC  
 TCTGGAGCAATTTTGAGAGA  
 AATGCTTTTAAATATTCATTGAATTTCTAGCT  
 GATAAATATATGATATTC AACCGCCCCCTCA  
 AAACAGTTCAGGAATCGTCA  
 GAGACAGTCAATTTTTATCACCATCAATGCCGGAGATTTTTGGGTAGCTAT  
 AAAGATTC AAAGGAAGTTTCATTCCATCTAAA  
 ATAACAGTTGAAATATGCAA  
 TGCTGTAGCTCTTTTTAACATGTTTTATCCCAATTCTTTTTGCGAACGAG  
 CAGAAGCAGGCTTTACCCTGACTTAATTGCT  
 GAATATAACGGATGGCTTAGAGCTATTATAGT  
 AAGCGGATTGTCAAAAATCA  
 TAACGGAACAATTTTTTCATTATTACAGATACATAACGTTTTTCCAAAAGGAAGATAAAAACCATTTTTAAATAGCGAG  
 GGAAGAAAAGCGTTTTAATTCGAGCTTCAAGTCAGGACGTT  
 TAAAACGAACGCCGAAAGACTTCAAATATCATCTACGTTAA  
 AAATTAAGCAATTTTTTAAAGCCTCATTGCGGGAGAATTTTTGCCTTTATTTAATCAGAAAAGTTTTTCCCCAAAAC  
 TAAATCATACGGTAACGCCAGGGGTAGCAACTTAACATCCAA  
 ATTCTACTAATTTTTTAGTAGTAGCAGGCTACAGAGGTTTTCTTTGAGGAC  
 AAATGGTCAATTTTTTAACTGTTTATTGATAAGAGTTTTGTCAATTTTG  
 TATGACCCCTAAATCGGTTGTACCATTAGATA  
 CATTTGCTAGATTTAGTTTGACCAAAAACAT  
 TAGCATGTATAGAACCCCATATATTTTTAAATCGTAAAAC  
 ACGACAGTATCTTTTTGGCCTCAGGACAAAGCGCATTTTTTTCGCCATTACCAGCTGGCGATTTTTAAGGGGGATG  
 GTAACCGTGCATTTAAATTTGTAACGTTAATATGGGCGCATC  
 CTGGTGCCCCAGCCAGCTTCCGGCGACCTGC  
 TCCATGTTATTGTGTCGAAATCCGCACCGCTT  
 GGCTCTTCTGTTGGGAAGGGCGAAAGAGGCA  
 AAAGAAATACACCAACCTAAAACGATCGGTGCG  
 TTACCTTATGCGATTTTTAAAGACTTTTCATGAGGAATGAA  
 AAATCAACGTAACAAAGCCCCAGCGATTATACCAAGCACCC  
 TACCTTTAATTGCTCCTGCTATATTTTCATTTGGGGCGAGAG  
 AATTAGCATGCTGCAAGGCGATTAAGTTGAGGCAAGGCAAAG  
 TAATACTTGAGCATAAAGTG  
 CGGTTGATCAACGCAAGGATAAAAATTTTATCATATGTACCC  
 AGGGGACGAGGAAGATTGTATAAGCAAATATCTGCCAGTTTG  
 AAACCAGGAGATCGCACTGG  
 CTATTACGGGCTGCGCAACG  
 TTCAACTTTAATCATTGGTTCCATTAACGGGTAAAATAAT  
 AGAACCGGATATTCATTGCGAAACAAAGTACAACGGAGGACA  
 ATTCTCCGTGGGAACCGAAGTACCAGACGG  
 AAAGGCTATCAGCTCATTTTTTAACCAAATTT  
 GTACGGTGTCTAGGGTGAGAAAGGCCGTAGGT  
 CAACAGGTCAGGATTAGCGAGCTGAAAAGGTGGCATCAACTC

**Table S8. Scaffold sequences for the individual toroid designs.** Template was M13mp18 ssDNA. Primer locations are underlined and phosphorothioated nucleotides shown in bold.

1536 nt for the 38 nm toroid

**gacgggtttg****ttactcgc****tcac**atttaatggtgatgaaagctggctacaggaaggccagacgcaattatTTTTgatggcgtt  
 ctattggttaaaaaatgagctgatttaacaaaaatttaatgccaattttaacaaaatattaacgtttacaatttaaatattg  
 cttatacaatcttcctgttttggggctttctgattatcaaccgggtacatatgattgacatgctagttttacgattaccg  
 ttcacgattctctgtttgctccagactctcaggcaatgacctgatagcctttgtagatctctcaaaaatagctaccctctc  
 cggcattaatTTATcagctagaacggttgaatatcatattgatgggtgatttgactgtctccggcctttctcacccttttgaat  
 ctttacctacacattactcaggcattgcatTTAAaataatagagggttctaaaaattttatccttgcggttgaataaaggct  
 tctcccgcaaaagattacagggtcataatgTTTTTgtacaaccgatttagctttatgctctgaggctttattgcttaattt  
 tgctaattctttgcttgcctgtatgatttattggatgTTaaatgctactactattagtagaattgatgccaccttttcagctc  
 gcgcccaaatgaaaatatagctaaacaggttattgaccatttgcgaaatgtatctaattggtcaactaaatctactcgttcg  
 cagaattgggaatcaactggttatatggaatgaaacttccagacaccgtaacttagttgcatatTTAAaacatggttgagctaca  
 gcattatattcagcaattaagctctaagccatccgcaaaaatgacctcttatcaaaaggagcaatTTAAaggtaactctctaact

ctgacctgttgagtttgcctccggctctggttcgctttgaagctcgaattaaaacgcgataatttgaagctttcgggcttct  
cttaatcttttgatgcaatccgctttgcttctgactataatagtcagggtaaagacctgatttttgattatggtcattctc  
gtttctgaactgtttaaagcatttgagggggattcaatgaaatattatgacgattccgcagatttggacgctatccagctca  
aacatttactattaccctctggcaaaacttctttgcaaaagcctctcgctattttggttttatcgtcgtctggtaaac  
gagggtatgatagtgcttcttactatgctcgttaattcctttggcgttatgtatctgcattagttgaaatgggtattcc  
taaatctcaactgatgaaatctttctacctgtaataatgtgttccggttagttcgttttataacgtagattttcttccaac  
gtcctgactggataatgagccagttcttaaaatcgcataaggttaattcacaatgattaaagttgaaatataaccatctcaag  
cccaatttactactcgttctggtgtttctcgtcagggcaagccttattcactgaatgagcagcttggttacgttgatttgggt  
aatgaatatccggttcttctgcaagattactcttgatgaaggtcagccagcctatgctcctggtctgtacaccgttcatctgtc  
ctcttcaaagttggtcagttcggttcccttatgattgacgctctgctcctcgttccggtaagtaacatggagcaggtcgcg  
gatttcgacacaatttatcaggcgatgatacaaaatcccggttgactttgtttcgcgcttggtataatcgtcgggggtcaaag  
atgagtgtttttagtgatcttttgcctctttcgttttagttggtgctctcgtagtgccattacgtattttaccggtttaa  
ggaaacttctcatgaaaaagcttttagtctcaaaagcctctgtagccttctgtagcctcctcagcctcctcagcctcctcagc  
tgagggtgacgatcccgcaaaagcggcctttaaactcctgcaagcctcagcgaaccgaatatacggttatgctggtggcgatgg  
ttgttgcatgtcggcgcaactatcggatcaagctgtttaag

**2119 nt for the 49 nm toroid**

gacgggttcttactcgcctcacatttaatggtgatgaaagctggctacaggaaggccagacgcgaattatttttgatggcgctc  
ctattggttaaaaaatgagctgatttaacaaaaatggaatttaacaaaaatataacgttacaatttaaatatttg  
cttatacaatcttctgcttttggggctttctgattatcaaccggggtacatatgattgacatgctagttttacgattaccg  
ttcatcgattctcttggttgctccagactctcaggcaatgacctgatagcctttgtagatctctcaaaaatagctaccctctc  
cggcattaatattatcagctagaacggttgaatatcatattgatgggtgattgactgtctccggcctttctcacccttttgaat  
ctttactacacattactcaggcattgcatttaaaatataatgaggggttctaaaaatttttatccttgcggtgaaataaaggct  
tctcccgcaaaagattacaggggtcataatgtttttggtacaaccgatttagctttatgctctgagggctttattgcttaattt  
tgctaattctttgccttgcctgtatgatttattggatgtaatgctactactattagtagaattgatgccaccttttcagctc  
gcgccccaaatgaaaaatagctaaacaggttattgaccatttgcgaaatgatctaatgggtcaactaaatctactcgttcg  
cagaattgggaatcaactgttatatggaatgaaacttccagacaccgtactttagttgcatatttaaaacatggttgagctaca  
gcattatattcagcaattaagctcctaagccatccgcaaaaatgacctcttatcaaaaaggagcaattaaggtactctcta  
ctgacctgttgagtttgcctccggctctggttcgctttgaagctcgaattaaaacgcgataatttgaagctttcgggcttctc  
cttaatcttttgatgcaatccgctttgcttctgactataatagtcagggtaaagacctgatttttgattatggtcattctc  
gtttctgaactgtttaaagcatttgagggggattcaatgaaatattatgacgattccgcagatttggacgctatccagctca  
aacatttactattaccctctggcaaaacttctttgcaaaagcctctcgtctattttggttttatcgtcgtctggtaaac  
gagggtatgatagtgcttcttactatgctcgttaattccttttggcgttatgtatctgcattagttgaaatgggtattcc  
taaatctcaactgatgaaatctttctacctgtaataatgtgttccggttagttcgttttataacgtagattttcttccaac  
gtcctgactggataatgagccagttcttaaaatcgcataaggttaattcacaatgattaaagttgaaatataaccatctcaag  
cccaatttactactcgttctggtgtttctcgtcagggcaagccttattcactgaatgagcagcttggttacgttgatttgggt  
aatgaatatccggttcttctgcaagattactcttgatgaaggtcagccagcctatgctcctggtctgtacaccgttcatctgtc  
ctcttcaaagttggtcagttcggttcccttatgattgacgctctgctcctcgttccggtaagtaacatggagcaggtcgcg  
gatttcgacacaatttatcaggcgatgatacaaaatcccggttgactttgtttcgcgcttggtataatcgtcgggggtcaaag  
atgagtgtttttagtgatcttttgcctctttcgttttagttggtgctctcgtagtgccattacgtattttaccggtttaa  
ggaaacttctcatgaaaaagcttttagtctcaaaagcctctgtagccttctgtagcctcctcagcctcctcagcctcctcagc  
tgagggtgacgatcccgcaaaagcggcctttaaactcctgcaagcctcagcgaaccgaatatacggttatgctggtggcgatgg  
ttgttgcatgtcggcgcaactatcggatcaagctgtttaagaaattcacctcgaaagcaagctgataaacggatacaatt  
aaaggctccttttggagccttttttggagattttcaacgtgaaaaaattattattcgaattccttttagttgttcccttct  
attctcactccgctgaaactgttgaagttgttttagcaaaatcccatagcaaaatcatttactaacgtctggaaagacgac  
aaaacttttagactgcttacgtaactatgagggctgtctgtggaatgctacagggcgttgtagttgtactgggtgacgaaactca  
gtgttacggtacatgggttctattggccttgctatctctgaaatgaggggtgggtggcctcaggggtggcgttctgaggggtg  
gcggttctgaggggtggcgtactaaacctcctgagtagcgtgatacacctattccgggctatactatatacaacctctcagc  
ggcacttatccgctggtactgagcaaaaccgctaatcctaactcttctcttggagggtctcagcctcttaatactttcat

**4069 nt for the 62 nm toroid**

gacgggttcttactcgcctcacatttaatggtgatgaaagctggctacaggaaggccagacgcgaattatttttgatggcgctc  
ctattggttaaaaaatgagctgatttaacaaaaatggaatttaacaaaaatataacgttacaatttaaatatttg  
cttatacaatcttctgcttttggggctttctgattatcaaccggggtacatatgattgacatgctagttttacgattaccg  
ttcatcgattctcttggttgctccagactctcaggcaatgacctgatagcctttgtagatctctcaaaaatagctaccctctc  
cggcattaatattatcagctagaacggttgaatatcatattgatgggtgattgactgtctccggcctttctcacccttttgaat  
ctttactacacattactcaggcattgcatttaaaatataatgaggggttctaaaaatttttatccttgcggtgaaataaaggct  
tctcccgcaaaagattacaggggtcataatgtttttggtacaaccgatttagctttatgctctgagggctttattgcttaattt  
tgctaattctttgccttgcctgtatgatttattggatgtaatgctactactattagtagaattgatgccaccttttcagctc  
gcgccccaaatgaaaaatagctaaacaggttattgaccatttgcgaaatgatctaatgggtcaactaaatctactcgttcg  
cagaattgggaatcaactgttatatggaatgaaacttccagacaccgtactttagttgcatatttaaaacatggttgagctaca  
gcattatattcagcaattaagctcctaagccatccgcaaaaatgacctcttatcaaaaaggagcaattaaggtactctcta  
ctgacctgttgagtttgcctccggctctggttcgctttgaagctcgaattaaaacgcgataatttgaagctttcgggcttctc  
cttaatcttttgatgcaatccgctttgcttctgactataatagtcagggtaaagacctgatttttgattatggtcattctc  
gtttctgaactgtttaaagcatttgagggggattcaatgaaatattatgacgattccgcagatttggacgctatccagctca  
aacatttactattaccctctggcaaaacttctttgcaaaagcctctcgtctattttggttttatcgtcgtctggtaaac  
gagggtatgatagtgcttcttactatgctcgttaattccttttggcgttatgtatctgcattagttgaaatgggtattcc  
taaatctcaactgatgaaatctttctacctgtaataatgtgttccggttagttcgttttataacgtagattttcttccaac  
gtcctgactggataatgagccagttcttaaaatcgcataaggttaattcacaatgattaaagttgaaatataaccatctcaag  
cccaatttactactcgttctggtgtttctcgtcagggcaagccttattcactgaatgagcagcttggttacgttgatttgggt  
aatgaatatccggttcttctgcaagattactcttgatgaaggtcagccagcctatgctcctggtctgtacaccgttcatctgtc  
ctcttcaaagttggtcagttcggttcccttatgattgacgctctgctcctcgttccggtaagtaacatggagcaggtcgcg  
gatttcgacacaatttatcaggcgatgatacaaaatcccggttgactttgtttcgcgcttggtataatcgtcgggggtcaaag  
atgagtgtttttagtgatcttttgcctctttcgttttagttggtgctctcgtagtgccattacgtattttaccggtttaa  
ggaaacttctcatgaaaaagcttttagtctcaaaagcctctgtagccttctgtagcctcctcagcctcctcagcctcctcagc  
tgagggtgacgatcccgcaaaagcggcctttaaactcctgcaagcctcagcgaaccgaatatacggttatgctggtggcgatgg  
ttgttgcatgtcggcgcaactatcggatcaagctgtttaagaaattcacctcgaaagcaagctgataaacggatacaatt  
aaaggctccttttggagccttttttggagattttcaacgtgaaaaaattattattcgaattccttttagttgttcccttct  
attctcactccgctgaaactgttgaagttgttttagcaaaatcccatagcaaaatcatttactaacgtctggaaagacgac  
aaaacttttagactgcttacgtaactatgagggctgtctgtggaatgctacagggcgttgtagttgtactgggtgacgaaactca  
gtgttacggtacatgggttctattggccttgctatctctgaaatgaggggtgggtggcctcaggggtggcgttctgaggggtg  
gcggttctgaggggtggcgtactaaacctcctgagtagcgtgatacacctattccgggctatactatatacaacctctcagc  
ggcacttatccgctggtactgagcaaaaccgctaatcctaactcttctcttggagggtctcagcctcttaatactttcat



gtttcagaataataggttccgaaataggcagggggcattaactgtttatacgggactgttactcaaggcactgaccccggtta  
aaacttattaccagtagactcctgtatcatcaaaagccatgtatgacgcttactggaacggttaaattcagagactgcgctttc  
cattctggctttaatgaggatattttgtttgtgaatatcaaggccaatcgctgacctgctcaacctcctgtcaatgctgg  
cggcgctctcgggtggttctgggtggcgctctgaggggtgggtgctctgaggggtggcggttctgaggggtggcgctctgagg  
gagggcgttccgggtggtcctcgttccgggtgattttgattatgaaaagatggcaaacgctaataagggggtctatgaccgaa  
aatgccgatgaaaacgctacagctctgacgctaaggcacaacttgattctgctgactgattacgggtgctgctatcgatgg  
tttcatgtgacgtttccggccttgctaaggtaatggtgctactggtgattttgctggctctaattcccaaatggctcaag  
tcggtgacgggtgataatcacccttaatagaataatcccgtaaatattacctccctccctcaatcggttgaaatgctgcct  
tttgtctttggcgctggtaaacatatagaatcttctattgattgtgacaaaataaacttattccggtggtgctttgctgttct  
tttataatggtgcccactttatgtatgattttctacgtttgtaacatactgctgaataaaggagtcttaatcatgcccagttct  
ttgggtattccggttattatgctgtttcctcgggttccctcgttctggttaactttgctcggctatctgcttactttcttaaaaagg  
gcttcggtaagatagctattgctattttcattggtttctgctcttattatgggcttaactcaattcttgggttattctctct  
gatattagcgtcaattaccctctgactttgttcaggggttcagtttaattctcccgctcaatggcgttccctgtttttatgt  
tattctctctgtaaaggctgctattttcattttgacgttaacaaaaaatcgtttctattttggattgggataaataatag  
gctgttattttgtaactggcaaataggctctggaagacgctcgtagcgttggttaagattcaggataaaaattgtagctgg  
gtgcaaaaatagcaactaatcttgatttaaggcttcaaaacctcccgcaagtcgggaggtctgctaaaacgctcgcgttctta  
gaataccggataagccttctatactgatttgccttgcctattggggtcggtaagattcctacgatgaaaataaaaacggctg  
cttggctcgtgtagtgcggtacttgggt

**4846 nt for the 74 nm toroid**

**gattacgaattcgagctcggta**ccggggatcctctagagtcgacctgcaggcatgcaagcttggcactggcgtcgttttac  
aacgctgtagctgggaaaacctggcgttacccaacttaatgccttgacgacatccccctttcgccagctggcgtaatagc  
gaagaggcccgaccgatcgcccttcccaacagttgctgacgctgaatggcgaatggcgctttgctggtttccggcaccaga  
agcgggtccggaaagctggctggagtcgactcttccctgagccgatactgctgctgctccctcaaacctggcagatgcacggtt  
acgatgcgcccactacaccaacgtgacctatcccattacggtcaatccgcggtttgttcccacggagaatccgacgggtgtg  
tactgctcacatttaattggtgatgaaagctggctacaggaaggccagacgcaattatttttgatggcgttccatttggtta  
aaaaatgagctgatttaacaaaaatataatgcaattttaacaaaaatataacggtttacaatttaaatatttgcctatacaat  
cttctgtttttggggcttttctgattatcaaccggggtacatatgattgacatgctagttttacgattaccgttcatcgatt  
ctctgtttgctccagactctcaggcaatgacctgatagcctttgtagatctctcaaaaaatagctaccctctccggcattaat  
ttatcagctagaacggttgaatatcatattgatgggtgattgactgtctccggcctttctcacccttttgaatctttacctac  
acattactcaggcattgcatttaaaatataatgaggggttcaaaaaatatttctccttgcggtgaaataaaggcttctcccgcaa  
aagtattacagggctcataatggttttgggtacaaccgattatgctttatgctctgaggtcttattgcttcaattttgctaattct  
ttgcttgctgtagatttattggatggttaattgactactactatttagatgaaattgtagtccacctttacgttccgctcccaaa  
tgaaaatatagctaaacagggtatttgaccatttgcaaatgtatctaattggtcaaaactaaactactcgttcgcagaattggg  
aatcaactgttatatggaatgaaactccagacaccgactttagttgcatatttaaaacatggtgagctacagcattatatt  
cagcaatgaagctctaagccatccgcaaaaatgacctctatcaaaaggagcaatgaaggtactctctaactcctgacctgtt  
ggagtttgcctccggctcgttccgctttgaagctcgaatataaacgcgataattggaagcttccgggcttccctctaatcttt  
ttgatgcaatccgctttgcttctgactataatagtcagggtaaaagacctgatttttgatttatgggtcattctcgttttctgaa  
ctgtttaaaagcatttgaggggattcaatgaatatttatgacgattccgcagatttgagcgtatccagctaaacattttac  
tattaccctctggcaaaaacttcttttgcaaaagcctcctcgtattttgggttttatcgtcgtctggttaaacgaggggttag  
atagtggtgctcttactatgctcgttaattccttttggcgcttatgtatctgcattagttgaaatggttattcctaaatctcaa  
ctgatgaatctttctacctgtaataatggttccgcttagttcgtttttatgaagtagatttttcttcccaacgctcctgactg  
gtataatgagccagttcttaaaatcgcataaaggtaattcaaatgattaaagttgaaatgaaccatctcaagccaatttac  
tactcgttctgggtgttctcgtcagggcaagccttattcactgaatgagcagctttgttacggttgatttgggtaatgaatatc  
cggttcttgcaagattactcttgatgaaggtcagccagcctatgcccctggtctgtacaccggttcatctgctcctcttcaaa  
gttggctcagttccggttcccttatgattgacgctctcgcctcgttccggctaagtaacatggagcaggtcgcggatattcgaca  
caattatcaggcgatgatacaaaatcctcgttgcactttgtttcgcgcttgggtataatcgtcgggggtcaaaagatgagttt  
tagtgattcttttgcctctttcgttttaggttgggtgcttctgtagtggtcattacgtattttaccggtttaaaggaaactcc  
tcatgaaaaagcttttagtcccaagcctctgtagccttgcctaccctcgttccgatgctgctttcgtcgtgaggggtgac  
gatcccgcaaaagcggcctttaaactcctgcaagcctcagcgaccgaatatacggttatgctggtggcgatgggtgttgc  
tgtcggcgcaactatcggatcaagctgtttaaagaaatcaccctcgaagcaagctgataaacggatacaattaaaggctcct  
tttgagcctttttttggagattttcaacgtgaaaaaattattatcgcaattccttttagttgttcttctattctcactc  
cgtgaaactgttgaaggttgggttagcaaaaatcccatacagaaaatcatttactaacgctcggaaagacgcaaaaactttag  
atcgttacgctaactatgagggctgtctgtggaatgctacagggctttagttgtactggtgacgaaactcagtggttacggt  
acatgggttctctattgggcttgcctatccctgaaaatgaggggtgggtgctctgaggggtggcggttctgaggggtggcggttctga  
gggtggcggtactaaacctcctgagtagcgtgatacacctattccgggctatacttatacaacctctcagcggcacttatc  
cgctggtactgagcaaaaccccgtaactcctaactcctctcttgaggagtctcagcctcttaataactttcatgtttcagaat  
aataggttccgaaataggcagggggcattaactgtttatacgggactgttactcaaggcactgaccccggttaaaacttatta  
ccagtacactctgtatcaaaaagccatgtatgacgcttactggaacggtaaatcagagactcgccttccattctggtc  
ttaatgaggtattttgttggtaatacaaggccaatcgctgactgctcctcaacctcctgctcaactcctgctgagggcgctc  
gggtggtggttctggtggcgctctgaggggtgggtgctctgaggggtggcggttctgaggggtggcggtcctgagggaggcggtt  
cgggtggtggtcctggttccgggtgattttgattatgaaaagatggcaaacgctaataagggggctatgaccgaaaatgccgatg  
aaaacgctcagctctgacgctaaaggcaaaccttgattctgctgctactgattacgggtgctgctatcgatgggttctattggt  
gacgtttccggccttgctaaggtaatggtgctactggtgattttgctgctcctaattcccaaatggctcaagtcgggtgacgg  
tgataattcacctttaaataaatttccgtcaatatttaccctccctccctcaatcggttgaaatgctgccttttcttcttgg  
gcgctggttaaacatatagaattttctattgattgtgacaaaataaacttattccggtggtgcttttgcgtttcttttatattg  
gccacctttatgtatgattttctacgtttgtaacatactcgtgaataaaggagtcttaatcatgcccagttcttttgggtatt  
ccgttattattgcttttccctcgggttccctctggtaactttgttccggctatctgcttacttttcttaaaaagggttccggtaa  
gatagctattgctatttcattgtttcttgccttattatgggcttaactcaattcttgggttattctctctgatattagc

ctcaattaccctctgactttgttcagggtgttcagtttaattctcccgtctaatagcgcttcctctgtttttatgttattctctct  
gtaaaggctgctattttcatttttgacgttaacaaaaaatcgtttcttatttgattgggataaataataggctgtttatt  
ttgtaactggcaaaattaggctctggaaagacgctcgttagcgttggttaagattcaggataaaattgtagctgggtgcaaaata  
gcaactaatcttgatttaaggcttcaaaacctcccgaagtcgggaggttcgtaaaacgcctcgcggttcttagaataccgga  
taagcctctctatatctgatttgcttctgatttgggcgctgtaagttatctctacgatgaaaaataaaaacggcttgcctgttctcg  
atgagtcgggtacttggtttaataaccgcttcttggaaatgataaggaaagacagcgcgattattgattggttctacatgctcgt  
aaattaggatgggatattatcttctgttcaggacttatctattggttgataaacaggcgcgcttctgcattagctgaacatgt  
tgtttatgtcgtcgtctggacagaattactttaccttttgcggtactttatattctcttattactggctcgaaaatgcctc  
tgcctaaattacatgttggcgttggtaaatatggcgattctcaattaagcctactgttgagcgttggcttatactggtaag  
aatttgtataacgcataatgataactaaacagggc

**5904 nt for the 90 nm toroid**

**gatta**cgaaattcgagctcggtaaccggggatcctctagagtcgacctgcaggcatgcaagctggcactggccgctgcttttac  
aacgctgctgactgggaaaacctggcgttacccaacttaatcgccttgcagcacatcccccttccgccagctggcgtaatagc  
gaagaggcccgaccgatcgcccttcccaacagttgctgcagcctgaatggcgaatggcgttcttgcctggttccggcaccaga  
agcgggtccggaaagctggctggagtgcatcttctgagggcgcgatactgctcgtcccctcaaactggcagatgcacgggt  
acgatgcgccatctacaccaacgtgacctatcccattacggtaacccgcttggctccacgggagaatccgacgggtgt  
tactcgtcacatttaattgattgatgaaagctggctacaggaaggccagacgcgaattatcttggatggcgttccctattggta  
aaaaatgagctgatttaacaaaaatggaattttaaacaaaatattaaactttacaatttaaatatttgcttatacaaat  
cttctgtttttgaggttttctgatttaacaccgggtgacatatgattgacatgctagttttacgattaccgttcatcgtatt  
ctctgtttgctccagactctcaggcaatgacctgagccttggtagatctctcaaaaatagctaccctcctcggcattaat  
ttatcagctagaacgggtgaaatcctatgattgggtgatttgactgctcggccttctcacccttttgaatctttacctac  
acattactcaggcattgcaatttaaaatataatgaggggttctaaaaattttatccttgcgttgaaataaaggcttctcccgcaa  
aagtattacagggctcataatgttttgggtacaaccgatttagctttatgctcgtgaggcttattgcttaattttgctaattct  
ttgccttgcctgtagatttattggatgttaatgctactactatttagtagaattgatgccaccttttcagctcgcgccccaaa  
tgaaaatagctaaacaggttattgaccatttgcgaaatgtagtctaatggcacaactaaatctactcgttcgcagaatggg  
aatcaactgttatatggaatgaaactccagacaccgtaacttttagttgcatatttaaaacatggttagctacagcattatatt  
cagcaattaagctctaagccatccgcaaaaatgacctcttcaaaaaggagcaattaaggtactctctaactcctgacctgtt  
ggagtttgcctccggctcgtggttcgctttgaagctcgaattaaacgcgataattggaagtctttcgggcttccctctaatcttt  
ttgatgcaatccgcttgcctctgactataatagtcagggtaaagacctgatttttgatttatggctattctcgttttctgaa  
ctgtttaaagcatttgagggggattcaatgaaatatttatgacgattccgcagatattggacgctatccagctaaacattttac  
tattacccccctctgcaaaaactcttttgcaaaagcctctcgtatattttgggtttttatcgtcgtctggtaaacggggttatg  
atagttgtccttactatgctcgaattccttttggcgttatgtagtctcattagttgaaatgggttatcctaagctctca  
ctgatgaaatcttctactcgttaataatgttgcctttagttcgttttataaactgagatttttcttcccaacgctcctgactg  
gtataatgagccagttcttaaaatcgcataaggtaattcacaatgattaaagtgaattaaaccatctcaagcccaatttac  
tactcgttctgggtgttctcgtcagggcaagccttattcactgaatgagcagctttgttacgttgatttgggtaatgaatc  
cggttcttgcgaagattactccttgatgaaagtcagccagcctatgcgcctggctcgtacaccgcttcatctcctcttcaaa  
gttggctcagttcgggttcccttatgattgaccgctcgcgcctcgttccggctaagtaacatggagcaggtcgcggatttcgaca  
caatttatcagggcatgatacaaatctcggttgactttgtttcgcgcttggtaataatcgtcgggggtcaaagatgagtggtt  
tagtgaattctttgcctctttcgttttaggttgggtcctcgtgagtgcaattacgtattttaccggtttaaaggaaacttcc  
tcatgaaaaagctcttagtcccaagcctctgtagccgttggctaccctcgttccgatgctgcttctcgtcgtcaggggtgac  
gatcccgcaaaagcggcctttaaactcctgcaagcctcagcgaccgaatataatcggttatgctggtggcagatgggtgtgcat  
tgtcggcgaactatcggatcaagctgtttaagaaatcacctcgaagcaagctgataaacggatacaattaaaggctcct  
tttggagccttttttttggagattttcaacgtgaaaaaattattattcgcgaattccttttagttgttcccttctattctcactc  
cgctgaaactgttgaaagtgttttagcaaaaatcccatacagaaaaatcatttactaacgtctggaagacgacaaaacttttag  
atcgttacgtaactatgagggctgctgtggaatgctcagggcgtttagttttagtctggtgacgaaactcagtttacgggt  
acatgggttctacttggcttgcctatcctgaaaatgaggggtggtgctcaggggtggtcgtttaggttgcgggttctgga  
gggtggcgtactaaacctcctgagtcaggtgatacacctattccgggctatacttataatcaacctctcagcggcacttatc  
cgcctggtactgagcaaaaccccgtaactcctaactcctctcttggaggctcagcctcttaatactttcatgtttcagaat  
aataggttccgaaataggcagggggcattaactgtttatcggggcactgttactcaaggcactgacccccgttaaaacttatta  
ccagtaactcctgatacatcaaaagccatgatgacgcttactggaacggtaaatcagagactgcgcttccattctggct  
ttaatgaggatttatttggttgtgaatatcaaggccaatcgtcgtgacctgcctcaacctcctgcaatgctggcggcggctc  
gggtggtggtcctgggtcggctcgtgaggggtgggtgctcaggggtggcgttctgaggggtggcggctcaggggagcgggtt  
cgggtggtggtcctggttccgggtgattttgattatgaaaagatggcaaacgctcaataaggggctatgaccgaaaaatgccgatg  
aaaacgcgctacagctcagcgtaaaggcaaaacttgattctgctcgtactgattacgggtgctgctatcgatgggttctattgg  
gacgtttccggccttgctaatggtaatgggtcactgggtgattttgctggctcaattcccaaatggctcaagtcgggtgacgg  
tgataattcacctttaaataatctcgtcaatatttaccctccctcctcaatcggttgaaatgctcgccttttgcctttg  
gagctggtaaacatagaaatttctattgattgtgacaaaataaacttatccgtgggtgcttcttgcgtttcttttatatggt  
gccacctttatgtagtattttctacgtttgctaactactcgtgtaataaggagctttaaactcagcagttcttttgggtatt  
ccgtttatttgcgtttctcgtttctcgtgtaactttgttcggctactcgttactttctcaaaaagggctcggtaa  
gatagctattgctatttctattgtttcttcttatttgggcttaactcaattcttgggttatctctcgtgatattagc  
ctcaattaccctctgactttgttcagggtgttcagtttaattctcccgtctaatagcgcttccctgtttttatgttattctctc  
gtaaaggctgctattttcatttttgacgttaacaaaaaatcgtttcttatttgattgggataaataataggctgtttatt  
ttgtaactggcaaaattaggctctggaaagacgctcgttagcgttggttaagattcaggataaaattgtagctgggtgcaaaata  
gcaactaatcttgatttaaggcttcaaaacctcccgaagtcgggaggttcgtaaaacgcctcgcggttcttagaataccgga  
taagcctctctatctgatttgcttctgatttgggcgctgtaagttatctctacgatgaaaaataaaaacggcttgcctgttctcg  
atgagtcgggtacttggtttaataaccgcttcttggaaatgataaggaaagacagcgcgattattgattggttctacatgctcgt  
aaattaggatgggatattatcttctgttcaggacttatctattggttgataaacaggcgcgcttctgcattagctgaacatgt  
tgtttatgtcgtcgtcgtggacagaattactttaccttttgcggtactttatattctcttattactggctcgaaaatgcctc

tgccataaacatggttggcggttgtaaaatgggcgattctcaattaagccctactggtgagcggttggtttatctggtgtaag  
 aatgtgtataacgcataatgataactaaacagggcttttctagtaattatgattccgggtgtttattcttatttaacgccttattt  
 atcacacggtcggtatttcaaaccattaataggtcagaagatgaaattaactaaaataatattgaaaaagtttctcgcg  
 ttctttgcttggcattggtattgcatcagcatttacatagttatataacccaacctaagccggagggttaaaagggtagtc  
 tctcagacctatgattttgataaaattcaactattgactcttctcagcgtcttaactaagctatogctatgtttcaaggattc  
 taagggaaaattaattaatagcgacgatttacagaagcaaggttattcactcacatataatgatttatgtactggttccatta  
 aaaaaggtaattcaaatgaaattgtaaaatgtaattaatttggtttcttgatggttggtttcatcatcttcttttgctcaggt  
 aattgaaatgaataatcgctctgcgcgattttgtaacttgggtattcaaaagcaatcaggcgaatccggtattggttctccc  
 atgtaaaagggtactggtactgtatattcatctgacggttaaacctgaaaaatctacgcaatttcttattttctggtttacgtgca  
 aataattttgatattggtagggttctaacccttccattattcagaagtataatccaacaacatcaggattatattgatgaattgcc  
 atcatctgataatcaggaatgatgataaattccgctcctctggtggttctttggttccgcaaaatgataatgtaactcaaa  
 cttttaaaattaataacggttcgggcaaaaggatttaatacagagttgtcgaattggttgaagcttaataacttctaatacctca  
 aatgtattatctattgacggtctaatctattagttgtagtgctcctaaagatattttagataaccttctcaattcctttc  
 aactggtgatttgcaactgaccagatattgattgagggttgatatttgagggttcagcaagggtgatgcttttagatttttcat  
 ttgctgctggc

**Table S9. Staple sequences for the 38 nm toroid design.**

|                                       |                                       |
|---------------------------------------|---------------------------------------|
| AGGATTAGAGAGTCATAAATACGAACTA          | GTGAGCGAGTATTTGGGGTAAATCGGGAAGTT      |
| CCTTTTGATAAGAGTTAAACAAAAGATTC         | TTTTAACCAAAAAAAAAAGCGCCATCATACTGC     |
| CACTATCATAACCCGTCGAATACAGGCA          | ATGATATTCATAAAGCCGCGAGCTGCGAGAG       |
| ATGGCTTAGAGCTTATTCACATTCAAC           | GGCATCAACTGTAGCCAGAGCTGATAAATTAATGCCG |
| CAGACCGGAAGCATGACTAATAAAAAAT          | ACACCAGAAAAATGGTCGTAATACTTCAAAA       |
| CGACGATAAAAAACAATAGTCAATAAAG          | TGCAATGCCTTATTTCACTTTGACCGGAAC        |
| GCTTTTGCAAAAAGCCGAAATTGTACCA          | ACGGAACAGGTTGATAACAAAAACAGGAAGATTGTA  |
| CGTTTAAATTCGAGGATTGCATTTGCGGG         | CATTTGCGCGAGTAGTAGTAAAGATTCAAAA       |
| AAACGAGAATGACACCTTTATGGAAGTT          | CTGGCCTTCTTCTACTAAAATTAAGAAAATGT      |
| TTAGACTGGATAGCTCGTTAGCATTAA           | AGAAGCCTTGAGTAATGTAATTGGGCTTGAGATGGTT |
| GGAATCGTCATAAATAAAGTAGGCATTTG         | TAATGCAGGCCTGAGAGTTGTTAAATCAGCTCATT   |
| CAGAAGCAAAGCGCTTCAAATTAGATA           | CGAACGAGCTTTAATCATAACCCTCATATATTTTAA  |
| CCCCCTCAAATGCTGTCTATATGTTTTA          | TAAGCAAATACTAAAGTACAGGTAGGTTTCA       |
| GATTAAGAGGAAGACTTCAAGTTTAGCT          | CTGAATATCATTAAATTTTCTGGAGCAAAACAGAGAA |
| TCAGGTCTTTACCCAACCTCCACAATTCG         | AAAACATTTGGCCGGAGATCGCTTGCCCTGACGAGAA |
| TTGCCAGAGGGGGTCAAATAGAAAAGGT          | CATCCAATTAGGAACGAGAGATCTACAAAAGGCTAT  |
| GGGTGAGAAAATGACCCTAATAACCTATATCG      | TCATTCCTACTGAAGCCCTCAGAAGCTCATTATACCA |
| TATGTACCCACATTTATCGGTGTCATTGCT        | CTCAGGACGAATCTACGTTGATTTCCACAGGTC     |
| TTTGAATAATGGGATAGTGTGAATTACCTTATGCG   | CCTCAGAGAACCCTTCTTTTATCAACCATTAAT     |
| CAGGTCAATATACATAAAATACGAAGAGCAA       | GAGAGGGTAAATTAGCAATAGTAGTTACCAGA      |
| TAAAATTCGAATGCTGTGAATACCATTGAATC      | ATATTTTCAACAACCCGAGTCAAATCACCATCAAT   |
| TAATTTCAATAGATTTAACGCAAGGTTATAGT      | AGGCAAGGCTATTTTTGCATCAAAAATAATTCGCGT  |
| ATCAGTTGGGTAATCGTAGTAAACGTTAATATTTTGT | AATATGCAATTTAAATTAAGTAGCATGTCAATCA    |
| ATTTTAAAGAAATAACAGTTAATAAACAAAA       | TCGATGAACAGATTTAGAGCTCAACTTTGCGG      |

**Table S10. Staple sequences for the 49 nm toroid design.**

|                                  |                                      |
|----------------------------------|--------------------------------------|
| TTAATAAAACGAACCTCATTCAATTTAGTT   | ACATTTATGAATTGCTGAAGCGGATTAGTACAA    |
| GAGGCATAGTAAGAAAGAGGATCATGAGG    | ATCGCGTTCAAAAACAGTAAAAATTTTLAGAACCC  |
| AGATTTAGGAATACAGAGTAACGAAAGAC    | TTTAGACTCCATCGCCCTTTAGCTATATTTTATT   |
| CGATTTTAAGAAGCTGGCTTTGAAAGTACG   | GCAAGGCAAAAGTTTCAAAAACAGAGTATACCA    |
| CCTAAAACGAAAAGAATAAGGGCTCCAACA   | GAAGTTTLAGGGGTAGCGGAGACTTGACGGGAGT   |
| GCAGATACATAACGAGGCGCAGGCTACAG    | TGACAACAAGGATAGCGTTGCAAAACAAATCA     |
| TATTACAGGTAGAATTTACCTGGTCAAT     | TATTTAAATGAGGAAGCTTTTTCGCGCGACCT     |
| CGGAGATTTGATTGAATCTATCTGTAGC     | AGACCGGAAATCATATGATGCCTGAGTAATGTGTA  |
| CTAAAACACTCATCAGCCGGAATTGCTCC    | GGTAAAGATATTAACGGTAATGCCGCAACAA      |
| GTCAGGACGTTGGGCGAGAAAAACAGTTG    | TATAGTCTTTTGTATCGGTTGTACCAAAA        |
| ATTATACCAAGCGCAATCCGATGGCTT      | AACCGGACTTTTGTGACGCATAACCAGATATAT    |
| TGATAAATTTGTGCGAAAACAGCATCAAA    | TCAACATGTAAAGCTAATAAATCAGCTCATTTTTT  |
| TTAATTTCAACTTTTGAATTTACTGACTAT   | TGGGGCGGAGATACATTTCAATACACAACAT      |
| ACGAGTAGTAAATTTGGCTCATAATGACCA   | CAAAGGCAATAGCGTAGCAACTAGGCTG         |
| GCAGACGGTCAATCGGCAAAAAGCGAACC    | AGCATCGGAATTAATGCCTATTTTTGAGAGATCTA  |
| AAGGCTTGCCCTGAAAGAAAACCTCAAAT    | GCTTTAAAGTAGCCAGCATCCAATAAATCATACAG  |
| ACGGTGTACAGACCCCAAGGACGACGATA    | TTTTGATAACGCAAGGAGAAGATTGTATAAGCAAA  |
| CTGACCAACTTTGAGCAGAAAGACTACACA   | CTATCATAAAGAATCGATTGAGAAAAGCCGGAGACA |
| GCTGACCTTCATCACACATTTCTTGCAAAA   | AACCAATAGAAATCAGGATGCAACTAGATGGT     |
| AAGAACCGGATATTAGATTCAGTAAAATG    | GTCAAATCAAGGACTAATTACCAGAGAATTAC     |
| ACGTAAACAAAGCTGTAAACGGATGCGGAAT  | GGTCAGGATTAATGCATACCCCGGTTGATAATCA   |
| GCTCCATGTTACTTTTTGACCCTTCAAAT    | GCAAAACAGACCCTCGTAGACTTTTCAGATGA     |
| GAAAAGCCCTTAATTCGTACCTTTAACGAGGC | CGCATTAAGAAGCAAAATAATGCATCGCC        |

TGACCATTAGCTGAAAATCATAGTTGCGCCGACAA  
TCATATATTTTAGAGAGAGCTTCAAGAATACA  
TTTATTTCAAGAGGTCACCGAAAGACCCAGCG  
GTGTCTGGAGAATTAGCCAAAAATAATTCGCGTCT  
ATTCCCAAAGCATTAACTTTCATCAACATTAATG  
TAAAGGCCGTCGTCACCGGGTAATATCAGTTG  
AAAACCAATATCAGGTCTGATATTCACCGTTC  
CGGTCGCTGGCCAGAGGCTCAGCAGTCTTGAC  
CTCAGAGCATTTTAAATTCTTTACCCCTTATG  
GGCCTTCCTCAGTTCAGTTCATATCACCAGA

TAAATCAAGAACGCCATAAAATTAAGCAATAAAGC  
AAGTTTCCTCAAAAGGGGAACGGTAATCGTAAAC  
TAGCATGTCAGCAATACGGTAAAAAACCGAA  
AATAGTAGTTTCTGCGATGAATCCCATCTACG  
AGGCTTGCCATCAATAATTGCCTGAGAGTCTGGA  
TAGCTGATAAACGAGGGAGAGGCTTAACTAAT  
AGAGCTTACCCTGTAATTAATATTTGTAAAATT  
TGAGCGAGTATATTCATACGAGTAGAGTGAAT  
CGTCATAAAACAACCCGGGTGGCATCAATTCTACT  
AAGATTAATGTAAACGTACTTTTGCGGGAGAAGCC

**Table S11. Staple sequences for the 62 nm toroid design.**

GCGCGAAACAAAGTAGTGCCGTAAGGGA  
TATCATCGCCTGATCGGGGTTTCGAGGAA  
TGCTTTTCGAGGTGAATAGAAAATACATA  
TTCCATTAACGGGGAGCCACACCATTA  
TTAAAGCCGCTTTCCTCATAAACCGAT  
CCACTACGAAGCAACCGCCAGAAACCA  
CCTCAGCAGCGAAAACACGCACGGAAA  
CAACAACCATCGCCGAATTTTGTACAA  
AAGAGGCAAAAGAACAGGAGGAGCGACA  
AGGACTAAAGACTTCAAGCCAGAGCCA  
AGCCTTAATTGTAATAATAACGCAGT  
ATATTCGGTCGCTGTTTGTGCGACCGG  
TTGATACCGATAGTAACCTTCCGCAAAG  
CATCTTTGACCCCTAGCCGAGACTGT  
GGCTGAGACTAAAACCAACTAAAGAAC  
GAGGGTAGCAACGGACACTGAACCGTCA  
ATTCCACAGACAGCTGCGGGAGCCTTGAT  
TAACGATCTAAAGTAGGCTTGATTAAGC  
TGTATCACCGTACTTACACTAGTTTGCCA  
CACCAGTACAAACTGACAGCAGACAGGAG  
GGATTTTGCTAAACTGCGCCGGGCTTTTG  
AGGATTAGGATTAGAAAAGTCATGATTG  
AGACGTTAGTAAATCAGCATGAATTTAC  
GTACCAGGCGGATAACAACGGCATGTTAC  
TCAGCGGAGTGAGAATTTCTATAAGTTT  
CCGCCACCCTCAGACCAACTGGAACCCAG  
CTAAAGGAATTGCGTCGGTTTAAACAGTGC  
CACGTTGAAAATCTAAGGCTCCTGCCTAT  
AACCGCACCCCTCATAAAATACTCAGAGC  
ATTTTCAGGGATAGTTTCATGCTCAGAGC  
ACCCATGTACCGTACTACAGAAGAACCAC  
GGTTGATATAAGTAAGCATTTGGCATT  
ATAACCCCTCAAACGTACTTTGAGTATCAGCT  
ATGATACTTTAAACAGAGATACATATATTTCAAC  
GGAAGCAAGCCGCCGGAATTTATCGTTTCGT  
TGTCGAATTTAGCTATCCTTTTTAAAATAGTAGT  
ATGCTGTAACCGGAATCACCAATCCCTCAG  
AGTTTGACGAACGAGGGTCAATCATCGAGAG  
TAGTAAAAAACAGTTATCCTTATTATTTTTT  
CCGTATATGTTTAGACGACGACGATCTCAGAGCA  
ACACCACGACTAATGCTTCAGAAAGTCAAAAAT  
ACCTTTAACTCAGAGCTGGGAATTAATAGGA  
AGGACAGATTTGACGCGCAATCATACCAA  
GGCTGGCTGTTTGCCTTATTAGCAAACACT  
ATGTTAGCGTTTACCATGATAGCTAAGTGAAC  
TCAAATGCAGGAGTGTAAAAGAAAACAGTT  
GAAAATAGCAGCCTTTACAGAAGCCTTACGCCAAA  
AGATTAAGAACAAATACGACATTCGTTAGCG  
GTTGAGGATTGAGCTTAAAGAACTGTGATAAATT  
ATTACCTTATAAAGGTCAGCATTTTCGGAAC  
ACCATAAAGTAAGCGTTTTATTTTCTGTATG  
CTGTAATACTTTTTCGGGAGAGAGAATGAATCCCC  
AATGCCGAGAGGGTAGCTCAAGATTAACCCAGACC  
TCTTTTCGTGTCTGGACAAGAGTAAAGCAAATAT  
AAATCAGATATAGAAGCCGGTAATCGTTGCCCTG  
AAAGGCTATCAGGTCATTAACCTCCCGTTAGAGAGT  
CCGACTTGTTAATTTTCGGTCAGGAACCTGCGGG  
TGAGGGAGGGACGTTGAAAGACTATCTTACCA  
GCAAGGCCCACTCAGTCTTAATTGATAGCAAGC  
CAAGAAACCCTATTATAATACCCACAAGAGA  
TGCGGAATGTCAGTGCAGAAAATACGGAACAA  
AAAGTACGATAATCAATAATCAGTTTTAGTA  
ATTACAAGGAAGCCCGGAAGAAAACAAATCACC  
ACGCAATAACCGAAGCATTTCCAAGTTAAGTTC  
ATAACCTGATCCGCGAAAGGAACTTGCTCA  
AAGCCCCAAAACAGGAAAGCAAGCCGATGCAACT  
TTGCGGATCTCAGAACGCACCATTACCCCTC  
CGTTCCATCAAAAATCGTTGAGATTATATATTTT  
ATTATAGTGAAAGCGCTATGGTTTTCTTTCC  
ACGCTAACGAGCGTCTTTGGAGACAGTATCTACGT  
CCACATTCAGAATAAGCATAACATAAATGA  
TTCCGAAAATAGAAGTTGCAAAGAAGCAAGGCAA  
AAAAGGGTGAGAAAGGCCCCAGAGCCTGCATCAAAA  
CACCAGAACTCCAACAACTTTAATGAGATCTAC  
AGGAATTACAACATATACTGGTAAAACAGC  
ACAGGGAAGCGCATTAGAACCAAAAACACACTATC  
AGCAGATAGTTACCAGCCTGCTCAGATTTG  
CGCGTCTGGCCTTCTGTGCTCAGTCAATTTTGAAG  
GCAAGGATAAAAATTTTTTTGTTTAAACACGAGAATG  
CCGCACTCATCGAGAACAGATTGTATATCTTGACA  
GAATCAAGACCTTCATAGTTTCATAACCAAGTA  
CAAATAAGAAACGATTTTAGAACCCCTCAGGAATA  
TAACGGGCGTCATAAAGTAAGAGCAATTATGACC  
ACGCGAGGCGTTTTAGCGGCTGAGAGATTGGGCT  
TTGCACCCAGCTACAATTCGTTCTAGCGCTCATT  
AAAGCTGCTGGAACCGCCTCCCGTAATG  
ACCCAAAGCCGAAGAACATTTTCGAAAATAATT  
TGCCATGAGAGGCTTTTTTTCAGAGCGCTAAT  
TCGATAGCTATTCATGTTTTAAATTTTTTATT  
CGGTCAATCCCAATTCACAGACCAAAAATTCGC  
ATTAATTTTTTGTAAATAGCCAGCTTAGTAGATTT  
AAATAGCGATTAAGACATGCCCCAAAAGG  
ATCAATATGATATTCACCTTATCCTGATCAAAATATC  
ACAAGAGAATCGATGAATTATCCGGTAGGTCATTT  
GCAAAATCACCAGAACTTGATAAGATTCTAAGA  
CATGTCAATCATATGTACCCGCGCCCATGAAATATA  
ATCAGAGAGATAACCCACATCATACAGATAGCAAT  
TGAGATGGTAGCCATTCGCCACCGGCTTTG  
TTAGCCGATTAGATACTGACCAACTTTTAAACCA  
ACCTGAACAAAAGTCAGACAATAAAGCAAAAACCA  
AGCGCGTTGAACGGTGTGCGAACGTCATCAACA  
AGCATTAACATCCAATAAAAAGAAATGATAAAGAG  
GCGTTTTACAGGTCAGAAATATTGCTGTAGC  
TAATAAAAACAAAAGGGAATCCTCCAGGGAG  
CACCACCTTGCTCCTTGAGTAGTAATCTGGAGCA  
AGAATTAGCAAAATTAAGGGGTAATTGAGGGGGTAA  
AGGTTTTGAAGCCTTAAATATTTTTTGACATTGTGA  
CGCCACCGGCTTAGAGGAATAAGGCTAAAACACTAG  
GTTACAAAATAAACAGCCATGTGTAGGTTATTACA  
ACGAGAAAACACCAGTACGCCACCGGAAT  
TTAAATTTGTAACGTTAAACAACCCGCTCCATATAA  
AAGGTGGCGAGGCATATATTCATTAACATAAAA  
TTATTCATTGCGATTTTCAAAGCGGTTGCTATT  
TACCAGTCAGGAAGGTACGATTGTGCTCAC  
AAATGCAATGCCTGAGTAATATTTTACCCTGACT  
CAGTTGATAGCCCCCTTAGCGTCGAATAGG  
GGTAGAAAAGAAATTCAGTCTCTAACCGAT  
AGCTATCTTATAACGGTCTGAAAATTAAGA  
CCAAAGACGAACTAACAGCGGATTAATTTGCCA  
ATTTGGGGCGCGAGCTGAAATTTCTACTGAAAAGTA  
AGAACCAGGAAACCGAATCACCAAAAACGA  
TTAAATGTGAGCGAGTAATATTTGTTGGCGCATA  
ATAGGAACGCCAGGCATCAAAGGTTCAAATGGTCA  
CAGAAATGCAGAAGCAAGGAACAACATAAAGATTC  
TCAATAGAATTCATCAAGGCTTTTATCCCAATC  
AGCCACCGCTCAACATACCCAAATCTAATCAGAA  
TCATCGTAGGAATCATTACCCGGTTGAAACGTAAC  
TAAAGCTAAATCGGTTGTCGGGAGAATGTCCAATAC

**Table S12. Staple sequences for the 74 nm toroid design.**

AATAAACAGCCATATTATCTCATTTTTCTTTTGAT  
GGAACGCCATCAAAAATACTAATTTGCTTAAATAT  
TAAAAC TAGCATGTCAATGGTTGATAACTACGTTA  
AATTGTAAACGTTAATATACGTCAAAAAGCCTTTA  
TACCGACAAAAGGTAAGGTCGACTCTACATAACG  
GAAACGATTTTTTGGTTTATTTGTTAAATAAAAACA  
AAAAATAATATCCCATCGGGCGAAAGGTTTTGCAA  
ATAGAAGGCTTATCCGGTCGTGCATCTACCCTGAC  
CCAAGAACGGGTATTAACCATTCCGCCACTGCGGA  
AAACCATCAATAATCGGGCGATCGGTTAGTAAAA  
TCTGGAGCAAAACAGAGATGTATAAGCATTATACC  
TGCAAGGCGATTAAAGTTGAGATAAGTCCCTTTATT  
AGGGGACGACGACAGTATATAGCAAGCAGGTGGCA  
GCGCAACTGTTGGGAAGGCTGTCTTTTCGAGCATAA  
ACAGTAGGGCTTTACCCCATATGAATATGCCGGA  
GTTTTAGCGAACCTCCCGGATAGGTCAATGCATCA  
GACAATAAACAACTGTTAAACGACGAAGAGCAA  
GAGAACAAGCAAGCCGTTCCGGCACC GCCCCCTCAA  
CCGGGTACCGAGCTCGAATAATAAGAGGAAAGGCC  
CGAGCTCTTTCCAGAGCATTCCGCTCAGGTCAGG  
TTCGCTATTACGCCAGCTTAATTTACGATTATGAC  
AGTAACAACCCGTCGGATGTTGCTATTTCTGCGAA  
GAGGCATTTTCGAGCCAGTTCGTAATCATTTAGGA  
TG TAGCCAGCTTTCATCAGAATCTTACGTTTCATT  
AGATGGGCGCATCGTAACATTCTAAGAAGCTATAT  
GCGGATGACCGTAATGGACTTCCGGGGATACATT  
GCACTCCAGCCAGCTTCTCTTATTTTCATTAACAT  
AAGCTTGCATGCCTGCAGTAATCTGTAGTAATGT  
AAATTTTGTAAATCAGTTATCCCAATGCTGAA  
AGCCTTAAATCAAGATTATCTCCGTGGGACTTCAA  
TCCCAGTCACGCAAGTTGTCAGCTAATGAGAACCCT  
CCCCAAAACAGGAAGTATCGATGAATACAAAGG  
ATACAATTTCTTACCATCAACATGTAATGATATT  
CGGAAACCAGGCAAAGCGCCAAGTACCAAGAATTA  
CTTGAGCCTTCAACTAAAGGTTGAAATATAAAG  
TTTTCATATTAAATGCCGCATAGTGCCAGTGCC  
GCCAAAGACAAAATAGGGGAGAAGCTGAACAAG  
GGTAATAATTTAGTTTGGCCGAAAGAACAACCG  
ACTTTAATCGTTGGGAGAGAGATCCGGTAATCG  
CGCCGCCAAAAGCAATACGTCCAATATTTAGGCT  
GTAACAGTACAGTTGACGAGCTTCATGTGAGCG  
CCAAAAGACAAAATCAGCTGAAAAAATCAGAT  
TGAGGGAGTAACCTCAAATTTTTTCAGAACGCG  
TCAGACGATCATACAGATTGAATCTTCTGGTGC  
TTACGCAGAACAGTTCGTAGTAGCATCGTAGGA  
ATAATAAGGGAAGCAAGCTTGGAAACAACGCTAA  
CAGTCTCTGGGGCGGAGGCTTTTGCCAGTTTG  
TAGCTATCTTTAATTTTCCAATTTGCACCCA  
CTCAGAGCCGGTTGTAGGGGTAAGCGGGCCTC  
AGAGATAAGTACCTTTAATCATGTTTACGTTACAA  
GTCAGACTTCAAATCACAGTTGAGATATGCGTT  
CGGTCTAAGATTCAAATGCAGATAGAGGATCC  
TTAGACGGCATTAAAGTGAATAGCATGAAAGAG  
ACCACCGGAAGGATAAGTTTACCACCAGGGTTT  
ATACATGGGGTCAATAAAAAGCGGACGTTGGTGT  
CCCTCAGAACTTTTGCCGAGAGGGGGATGTGC  
TCACCAGTAGATTTCATCCATCAATATTTAGGCA  
CAAAGACTGGATAGAAAGCTCACTTATCATT  
CAGTAGCGTCTAGTTGAACAACAACAACGCTCA  
CAATCAATTTGCCAGACAAAACAGCATGTAG  
ATTCATTAAATTACGAAATGCCTGCCAGACGAC  
AGAAGGATATAGCTTAGGATGACAATTCGCATT  
TGACGAGATCATTGCCACTGGCTCAAATATTTA  
GGCTTGAGCTATTTTAAAAAATTCAGAAAAG  
TAAATCCTTACTAATAAGAAAACGAGGAAGATC  
AAAGTCAGATTTTTGCGAGCTTAATCCAAATAA  
CGGAAACGAACTAACGATAAATATGAGAATCG  
ATACATAAAAAATATTCGCAAGGCAGCACTCATC  
CCTGCCTAAGTACGGTACTCCAACCTGGCCTTCC  
GAAACCGATCAGAAGCCTGTTTACGGGAGGC  
GTAAGCAGAAGAGGAAGACCATTAAGGTTTTGA  
TGAAAGTTGTAGCTCAATTGCTCTAACCAATA  
ATACCACAATTTGGGATTTTCATCCAGGCG  
ATGCTTTATATGTTAGGATATTCAAACACTC  
CATATATATCAAATAAATATTGATTTTCGTC  
CCTGTAATACCGCCACCATATGGTTTAGCGT  
TGTTTAGACCACGGAAGAACCACCGATTGT  
AGGTAGAAAAGCACCATCAAGTTTGCAAGAGT  
CAGAGAGATAGGATTAAGTGAACACGAGAGG  
CCAAAAGGAAGGTGAAATTCGCGTGAAGAG  
ATAAAAACGTCACCAATATAGCAGCTTCATTA  
GCAACTAATTTCCGAAAATTGAGTTGCGCCG  
TATAATGCATTAAGAGTGAGCGCTCACGCAT  
CTATCAGGAACACCAGATTACCTTAATAGGT  
ATAAAAACAAAAGGTTCCCTCAGTTAGCCG  
CCAATAAATTTGGCCTTCAAACCTAACAGTTT  
AAGAAGTTAGAAAATTCCTCAGAGTCGAAAT  
CCATAAATACTGGCATGCCAGAATAAACGAA  
CACTATCAGGAAGGTACACCGGAATCATAAG  
AGTACAGACATTGTGAACGAGTATGCTCAT  
AGCTAAATCGCCACCATAAGTTTACTTTCCA  
AAAAGATTATAGCCGAGATACAGGGGAAGTT  
GCAAAAATTCATTTGACACATATAATGTATGG  
GGGAAGCGGAGAATTAGCGGGGTTACCAGGC  
TCGCAAACTTTTTGATACAAAGTTAAGGCTC  
GTAGGTAAGCCCCCTTTTATCACCATAGGAA  
GGAGACAGGTAGCGCGATTAGAGCACCCCTCA  
ATTAGAGACCCACAAGCCTATTATCGTCAAC  
GAGGTTAGATGCATCGGAACAGCTTTTAGTAC  
TTTTCATTTGAATTTACAAATAAATTTTTC  
AAGAGGTCAGGGTAATGCTGAGACAGGGAGT  
ACCAGACCAGCAAGAATAAACAGTCCGGAACG  
ATATCCGCTTACCGAAGGGGTACGGCTTTGA  
CGAGTAGAGTTTTAACGCCCTTTTTCGGTTT  
ATCGTCATAGGTGGCAAGGAGGTTTACCAAG  
TATTTAGGGAAACCGCGTTCCAGGTAATGC  
CCATATTTAACAACGCATAAAGCTTATTAC  
ATCATTACCGCGCCACGGCCTCAGAATGA  
CCTGTTTATCAACAATGGTAACGGACGACG  
GCTACAATTTTATCCTACATTA AAAAGCGA  
TCAATTCATTAAGATTAAGGAACAAC  
CCATATAGCCCGTAACAATGAATTTCTT  
CAACCGTACAGAATTACCATTCTCAGA  
TCAACGCAACCGCCGACATTTGTAGCA  
ACAATGACAACAACCGGGATTCTGAAACA  
ACCGCCACCCTCAGCCTTCATCCTTTAGC  
AAACAGCTTGATACACAGCATTAATGCC  
GACGTTAGTAAATGCAACGGAACGAGAGC  
CCCATGTACCGTAACAACCTTTTGGCCATC  
CGCCACCCTCAGAACC GGATAACCGTAAT  
CAAAGGAGCCTTTTTTTCATGAAGTGTACT  
TAAAGGAATTGCGACAACCTAGGAAAGCG  
ACCAGTACAAAACCTACGGTCAACCAGAGCC  
AACGATCTAAAGTTAATTTGTCACCACC  
GATTTTGTAAACAGCGATTAGAGGCCAGG  
ATCAGCTTGCTTTCTACAGAGTGCCTTGA  
CAGCGGAGTGAGAAACACTAACAAACAAA  
AACCAGATATTTCCGGCTTGCTCCTCAAG  
TTCCACAGACAGCCATGTTACAGCCGCCA  
GTTGATATAAGTATTTGCAAGTTTGCTCCC  
TTTTCAGGGATAGCGTACAGAGGCATTTT  
GTATCACCGTACTCACAAGCAGTAAATTTG  
ACGTTGAAAATCTCAAATACTAAGCGTGC  
GGACTAAAGACTTTAATTTGATAAAGAAA

CATAGGCTGGCTGAAGCCACCCAGCAAAA  
TAAAGGCCGCTTTTTATCGCCAATATCAG  
AGGGTAGCAACGGCGAGGTGAAATAGCAA  
AGAGGCAAAAGAATTAGAAAGACTCCCTTA  
CACTACGAAGGCACATATAACGGAATAC  
ATCATCGCCTGATATTTGTCGTTTTTGTCA  
GAACGAGGCGCAGACAACGCCAACCGAT  
AATCTTGACAAGAACCGCCACAGCAAGGC  
CCGCGACCTGCTCCCTCATAGTTACCAGC

CTCAGCAGCGAAAGCGATAGTTAAGCCCA  
TCAGTGAATAAGGCAGCCCGGATGCGATT  
GGATAAGTGCCTGAGTCGCGTCCCTGAAC  
GGAACCGAACTGACCCTGAGCGGAAAT  
CCCAAATCAACGTAAGGAGGTTAATTTCA  
ATCTTTGACCCCCAACTTTTCAGAAAATAC  
GACAGATGAACGGTAAGCCAGTCACCGA  
TCCATTAAACGGGTCAAAAAACCAGAG  
CGCGAAACAAAGTAAATTTTCAAGAAACG

**Table S13. Staple sequences for the 90 nm toroid design.**

ACCAGGCAAAGGCCATTAGTTTCATGTTTAGAC  
GCTTGCATGCGTGCAGGTGAGCTTCAAAAGATTAA  
TTCAAATAGAGAGGCTGAGGCAAAATCGCACTC  
CTAAAACACCACCTCTTAATTTTCATCACCG  
AAAATAGCTATTTTAGATTTTCAGTTATCCCA  
AGAAGCAACTTAGAATAGTTTCAGTAAGAACG  
AATGCTGTAGCTCAACATCGGTGCGTGAGGACT  
AAAATCAGGATTAAGATCTGTATGCCGACTTG  
CAGTCACGACGTTGTAAAACAGGTCATTATAGTC  
AAAGCGCAGATGAATATGTTTGGATTTTGGAGA  
CCGGAATCATGCAGATAAATTGTGCGCGGATT  
AACTGTTGGGAGGGCGATGTTTTAAATCGTCATA  
AGTATCATCAGTTGAGTTACTTAGGAGTAACAA  
TTGAGGATTTAGAAGTATCAAATATCTTTCGAG  
TTCAACTAATAATTACGCCCGGAAGGAAGCGC  
TCACCGTACGCTGATACATAACGTAGTAGTAG  
TATAAACGTCGAATAGGAAGTTTAGGCTGCGC  
TGGATAGCTATATGTACAACTACCTAACGAG  
GGTTGATAGCTCCATGATTTAGGACAAGGCAAA  
CTGACCAAAGGATTAGAACAGTAGCAAAAGAC  
CATAACCGAGGAACAAATCGTCGCCGTTTGC  
AAAGTACGGTCTGAGACGCCATTCCCATTA  
AGGGAGTTCTTTCAACCCTTGAAGGCATTT  
AATCAATATCTGGTCAGTCTCAATAGATTATCAT  
ACAATTTCCACCAGAATCAGCTTGCAAAACCTC  
TTTAAATGCAATGCCTGATATTTAAACCGGATA  
CTGAATAAGCCTTGATATTTACCGGAGCATGT  
GACGATTGTGGAAGGGCGTAGATTGAATCGATG  
TAAGAGAAAATCATGTTGACAAAGAAATGTAAAC  
GTGATAAAGGCATAGTAAGTACAATGTAGATGG  
CATTCAGTTAATAAGTGACGACAAAACGCAA  
CGGGTACCGAGCTCGAATATCCTTTGCTAATTTTA  
AAAGACTTCACAGACACCGGCTTAACCAATG  
CGCGACCTTAAGTATATGAAAAAACAGCG  
CCTTGAGTCCAAATCATTTGAGATGTAGGTAAAG  
CCAACCTAAGGAACCAACGCGAGAATTAGA  
AGTTTCGTATACGTAAAGTAAATCCATATAAC  
CATTAACATCCAATAAAGGAACAAATCGAAATC  
GAATAGAAAATATTTCCGATCAAAAAGCAACCA  
TCAATATATAAAGCAAACCTGAGCTGTCTTTTC  
AAAGAAACATTTGAATAGCCTTTTACAAGCAAG  
CGGGTAAACACCAGTAAATGCTGACCATTAC  
TAACGATCACGGCTACCCCTCAAAGCTGAATAT  
GCATCACCTTGGTGAACCTTAGACTTTTGCAGAAC  
CAGCCAGCTTTCCGGCACGCGAACGAGAGAAGTT  
ACCTGTTTAGCTATATTTCTGCCAGAGCGATTA  
AGCTTTCATCAACATTAACAATAAAGCAGGTAGAA  
CCTGTAATACTTTTGGCTAACCAATATGAACGG  
TAGCATTCTTTTCATGACTGCGGAATATGCAACT  
GAACTAACCAACGCTCGATTAGCGGAGCGCTA  
TACCCCGGTTGATAATCAAGGCCGAGACCAGAAC  
AACCTTGCCCGAAAGAAACACCATGAGGATCCC  
AACGGTAATCGTAAACTTTTCAACCCTTACCATAT  
TCATCAAGGCCATTTTATTTTCGAAGTATGT  
AGTACCTTTAATTGCTCTAACGCCAGGATCGTC  
AGCGTCATAGAAAATGTTAGAACCTCTAGCTGA  
TCAACTTTTATAAAGTCCGTATAATACCGAAG  
GAGTAGTAGTCCAGACTTTAACGGAGATAGCC  
GACCGTAATGGGATAGGTTTCTACTAACCAAAAGG

ACCTAAATGTTTACCATGACCCCTTTGAGGGG  
GGTTACCATTGAATTAGGAGCGGAATAATACAT  
AAAGTTTGATAAATCATTGAAAATGAATCATT  
GCTATTACGCCAGCTGGCAGCTTAATTTGCTTTAA  
ATGTTTCAGTTTCTGACTTGCGCAAATCATATG  
AACTAATAGATTAGAGCTGGCAAATGATTCGCC  
TAACGTGAGTCTCTGAATTCACAAAGCATTG  
CAAAATTAATAATGCATTTGATGAAAGAAAA  
AAAGGAATTGAGGAAGGTATCTTTAGGGCAATTC  
ACAGTTCATTATCAAATGTCGTCTATCAAGAT  
TAACCCTCTTAATGGTTCAGAACCCTGTTTAA  
GAAACATGCCAGGCGCCATTATACCTTTATTTCA  
ATAGCTTAGTCTTTACCTTTTGCAGGGTTTCC  
GGGTAGCATAAAGTTTATCATAGGAATCAGT  
TAGTGAATGAAAACGAGACAGCATGATGTGCTG  
GACCGGAAGCAAACCTCCACGACGGCAGGCTTGC  
GTGAATTTCCAAAAGGTACCTTTTCCCTCA  
ATTATTCAGGGAGAAAAGATGATGAGCACTAAC  
ACTACCTTTTGAATCCAGAGGCTTGGCCTTTC  
AGTTGATTCCCAATCTCGCTTCTGCGAAGGCA  
AATATTCATTTAACCTGCCCTCATCTACAATT  
CTCAGTACACGGTCAAATTAATACCTCAGAGCA  
ATAAAGCGGAACAACCTATAAGCCCTGTAGCC  
TGCCAGAGAGACAAAGATGATACCGGCGAGTTA  
TAATTTAGAACTGGCTATAGGCTGAAATTTTTG  
TCAAGAGACTTTGAAATCTACGTTTATTATGAC  
TTCATTACAACAGTGCACCGACAAACTGGCA  
ATTTTAAGGCAGAGGCCGGAACCTAAGAAACA  
CAAGGCGATTAAAGTTGGGCTTTTGAATAATAATCA  
GATCTACAAAGGAAAATTAATCTCTACAGTACCT  
AATTACGATAAGGCGTGTATTAGTACCTTTACA  
TGATTGCTAGTTACAAAATTAATCACCCCTC  
TGCCCCCTAGTAATCTTGAATTACCTCATATAT  
ACGCAAGGATAAAAATTTTCGCAATGCTGACCT  
GTTAGTAACAGCGAAAGAAATGACCAGAGGTGAT  
ACCTCAGATGAATTTTCGCTGAGATTAGCGT  
ATTCAAAAGGGTGAGAAGAAAAGCCAAGCTGCT  
TGTACTGGGAATAAGGCGGAAACACAGTCAA  
CAATCGCAGGGGTAATTTGCAACTAGTGCAGGAA  
TGACAGAAAAGTATTTAACAACGCATAAAG  
TGAGAAATCAAGAAAAGAGGACAGAGGAACGCC  
CTCAGAACCGGAAACAAAGAGCAAGGCGCGAGC  
TTAAATCAGCTCATTTTGGAGAAGCCAGTACAGG  
TCACCATCAATATGATAAGCATGTCCGTA  
CTAAACAAAAGGCCGCTGACTAGGATTAGAG  
AGCCCAATAAACGAAATTTGCAAAATAGATTTAG  
TTTGACCATTAGATACATCAGGAAGAGAATACA  
TACCAAGCCGCCACCTTGAATATGACGGA  
TAAAGCTAAATCGGTTGCTGGCTTGAACCGGAA  
TTTACATCTTTCAATTAAGAAGATCCACCAG  
ATCCTCATATCCTGATTACAGTAATCAGGTGAT  
GAGGAAGCTTCTGTAACATAAGGAATCAGATA  
TGAAAAGGTGGCATCAACACGTTGGCGGAGATT  
ACGTTGGGGCCATTAATAGAGGCTAGAAATGA  
CATATTCCAGAAAACAAATCGCGCATTAACC  
AATTTTCCAGCGGATTGGTGCCTGCAGTGCCAA  
TGCCGTGAGAGTCTGGAGCGGGTAGCTATTACTT  
GAATTAGCAAAATTAAGATGTGAGCCCGGAACG  
TTTTGCGGATGGCTTAGGAAAGGGCGGAACGA

AGGCGCAGCAGCGGATACAAATTTTACAAT  
 TCGCGCGATTTTTCACGATATATGTCCGGAAC  
 AGATTCATATGCGTTATAAGTGCCAAACCCCT  
 AGAAATAAACATGGCTGAAACGCGCAACAATA  
 TGTATCATCTCAGGAGTAAATAAGCAACCGA  
 AAAAGGCTCTTAAACATATCATTTACAAACAAT  
 GTTAATATTTTGTAAAATTTAGAACCCTTATGCG  
 GCGCATCGTAACCGTGCATTCATTTGGCACTATCA  
 TAATAATTCATGACACTTGTATCCGAACCAA  
 TCGACAACCTCGTATTAATCGTAATCCCGATAGT  
 CCCGTCCGATTCCTCCGTGCATACAGGATACCACA  
 TAAATTAATGCCGAGAAAACAAGATTCAGGTT  
 CAGAGCCACTCATCTTGACGACGATGGTCAATA  
 GGAAGATTGTATAAGCAAAGTAATGTGGTTAATT  
 GTAATTCTAATTGGGCACGTAACACCAAAAACA  
 ACGACGACAGTATCGGCCCTTCGCAATAAAAACC  
 ATCAAAAATAATTCGCGTTACCAAAAAATAAAAC  
 AAACATCATGATTATCCAATAACGCAACAGTTG  
 AACAGTACAGTAACATGCTTGATAAAATCTAAA  
 ATATCGCGTTTTAATTCGACTCTACGCCACG  
 CTTATCATTCGAAGAGAGCCGGATGAAAC  
 GAGAGAATAACATACGACATTAATAAACA  
 TAGAAGGCTTATCCTTATAGTATTAATT  
 CCGTTTTTATTTTCAACCGCCTTAATGGA  
 CAAAATAAACAGCCATTTGGGAAACTTT  
 GAACAAGTCCAGAGTATTTGCTTACCAGT  
 ATTAGACGGGAGAAATGGTTTGCCTGTTT  
 CGAGGCGTTTTAGCTTTTATCACATAGCG  
 ATCCAAATAAGAAAGTGAATTATCTCTCTG  
 ATATCAGAGAGATAAGAAACGGGCTTAAT  
 CGGGAGGTTTTGAATTTGCTTAGAGTCAA  
 TAGTTGCTATTTTGGCACCGTTCTGAGAG  
 ACCGCGCCCAATAGAAAATCAGAGTGAAT

TAATATCCCATCCTAGGTATCCTGTTTCA  
 TTATCCTGAATCTTAAACGTCGGTTGGGT  
 CGTCAAAAATGAAATAAATATCCGACCGT  
 AAGTACCGCACTCAGAACCCTACATTTA  
 CGTCTTTCCAGAGCAGTAGCATGCAAAATC  
 GTTAAGCCCAATAAATACATACCACATG  
 ATGAAATAGCAATAATACGCGCCAGTAA  
 CCCTTTTAAAGAAACAAAAGAAAGTAAA  
 AGAAACCAATCAATCGCCGCCACAATAA  
 GAACAAAGTTACCACCGAGGATAAACAAC  
 AATTATTCATTAAGCGATTTTGGCACCCCT  
 AGCGACAGAATCAAGGCCCTAATTCAGAC  
 TGATTAAGACTCCTTGCTATCTACAGTTAA  
 CATCTTTTCATAATCCAAGCAAATTCGCAA  
 TAATAACGGAATACCAGTAAGCGGTCAGTG  
 AGAGCCACCACCTCAACGGGTAGAGGCGA  
 ACCACGGAATAAGTTGGTAATTGGGTTTTG  
 GTGGCAACATATAAAACCCACAGAGACTCC  
 GCCAGCAAAATCACCTAATTTTAACTACTG  
 ACAGGAGGTTGAGGCAATTTACTTCCAGTA  
 GATAAGTCCCTGAAAGAAGAACTACAGGAG  
 CAGAGCCACCACCGGATCGTAGCTCCAAAA  
 TTGAGGGAGGGAAGGATAGCAGCCGCCACC  
 CATTAGCAAGCCCGGACCAACGAACGCTG  
 AACCAACCCAGAGCAATCGGCCAGAATGG  
 AAACCATCGATAGCACACCCAGAGTTAGCG  
 CAGACTGTAGCGCGTGAACCTCGGATTTT  
 TCACCGACTTGAGCCATATTATGGATAGCA  
 GAGCCGCCACCCTCATCGAGAAATGTATC  
 TAGCAAACGTAGAAATAAGAGCATTATTCT  
 TCGGTCATAGCCCCGGTATTCCGGAGTGA  
 CCAAAGACAAAAGGGAACAGTAGGTGTA  
 CAATAGAAAATTCATTTAACTGGTTCGAGAG

**Table S14. Primer sequences for Figures 4 and S9.** Template was M13mp18 ssDNA for 2,342 nt ssDNA and Lambda DNA for 5,000, 10,000 and 15,072 nt ssDNA. Phosphorothioated nucleotides shown in bold.

|                                                 |                                 |
|-------------------------------------------------|---------------------------------|
| <b>2,342 nt ssDNA (Template = M13mp18):</b>     |                                 |
| 2342_Fwd                                        | <b>GATTAC</b> GAATTCGAGCTCGGTAC |
| 2342_Rev                                        | GACTTTTTTCATGAGGAAGTTTCC        |
| <b>5,000 nt ssDNA (Template = Lambda DNA):</b>  |                                 |
| 5000_Fwd                                        | <b>CGTCA</b> TAAAATGGTATGCCG    |
| 5000_Rev                                        | GGGATTTACGTGCATCCAGT            |
| <b>10,000 nt ssDNA (Template = Lambda DNA):</b> |                                 |
| 10000_Fwd                                       | <b>CGTCA</b> TAAAATGGTATGCCG    |
| 10000_Rev                                       | ATCCGGATCGCTGAAAAACA            |
| <b>15,072 nt ssDNA (Template = Lambda DNA):</b> |                                 |
| 15072_Fwd                                       | <b>CGTCA</b> TAAAATGGTATGCCG    |
| 15072_Rev                                       | GCTGATCTCCTGAGAAACCA            |

**Table S15. Scaffold sequences for the split 62 nm Toroid shown in Figures 5a & 5b.** Template was either Lambda DNA or pEGFP-C1 DNA as indicated. Primer locations are underlined and phosphorothioated nucleotides shown in bold.

**2048 nt ssDNA part 1. Template = Lambda DNA**  
**CGTCA**TAAAATGGTATGCCGAAAGGGATGCTGAAATTTGAGAACGAAAAGCTGCGCCGGGAGGTTGAAGAATGCGGCAGGCCA  
 GCGAGGCAGATCTCCAGCCAGGAACATTTGAGTACGAACGCCATCGACTTACGCGTGCAGGCGACGCACAGGAACCTGAAG  
 AATGCCAGAGACTCCGCTGAAGTGGTGGAAACCGCATCTGTACTTTCTGTGCTGTGCGGGATCGCAGGTGAAATTTGCCAGTAT  
 TCTCGACGGGCTCCCCCTGTCGGTGCAGCGGCGTTTTCCGGAACCTGAAAACCGACATGTTGATTTCTGAAACGGGATATCA  
 TCAAAGCCATGAACAAAGCAGCCGCGCTGGATGAACTGATACCGGGTTGCTGAGTGAATATATCGAACAGTCAGGTTAACAG  
 GCTGCGGCATTTTGTCCGCGCCGGCTTCGCTCACTGTTTCAAGCCGGAGCCACAGACCGCCGTTGAATGGGCGGATGCTAAT  
 ACTATCTCCGAAAGAATCCGCATACCAGGAAGGGCGCTGGGAAACACTGCCCTTTTACGCGGCCATCATGAATGCGATGGGC



AGCGACTACATCCGTTGAGGTGAATGTGGTGAAGTCTGCCCGTGTCCGGTTATTCAAAATGCTGCTGGGTGTTTATGCCTACTT  
TATAGAGCATAAGCAGCGCAACACCCTTATCTGGTTGCCGACGGATGGTGATGCCGAGAACTTTATGAAAACCCACGTTGAGC  
CGACTATTTCGTGATATTCGTCGCTGCTGGCGCTGGCCCCGTGGTATGGCAAAAAGCACCAGGATAACACGCTCACCATGAAG  
CGTTTCACTAATGGCGTGGCTTCTGGTGCCTGGCGGTAAAGCGGCAAAAACCTACCGTGAAAAGTCCGTTGATGTGGCGGG  
TTATGATGAACCTTGCTGCTTTTGTATGATGATATTTGAACAGGAAGGCTCTCCGACGTTCCCTGGGTGACAAGCGTATTGAAGGCT  
CGGTCTGGCCAAAAGTCCATCCGTGGCTCCACGCCAAAAGTGAGAGGCACCTGTGAGATTGAGCGTGCAGCCAGTGAATCCCCG  
CATTTTATGCGTTTTTCATGTTGCCCTGCCCGCATTGCGGGGAGGAGCAGTATCTTAAATTTGGCGACAAAGAGACGCCGTTTGG  
CCTCAATGAGACGCCGATGACCCCTCCAGCGTGTTTTATCTCTGCGAGCATAATGCCTGCGTCATCCGCCAGCAGGAGCTGG  
ACTTTACTGATGCCCGTTATATCTGCGAAAAGACCCGGATCTGGACCCGTGATGGCATTCTCTGGTTTTTCGTCATCCGGTGAA  
GAGATTGAGCCACCTGACAGTGTGACCTTTCACATCTGGACAGCGTACAGCCCGTTTACCACCTGGGTGCAGATTGTCAAAGA  
CTGGATGAAAACGAAAGGGGATACGGGAAAACGTAAAACCTTCGTAACACCACGCTCGGTGAGACGTGGGAGCGAAAATTG  
GCGAACGTCGCGATGCTGAAGTGTGGCAGAGCGGAAAGAGCATTATTCAGCGCCCGTTCTGACCGTGTGGCTTACCTGACC  
GCCGGTATCGACTCCAGCTGGACCGTACGAAATGCGGTATGGGGATGGGGCCGGGTGAGGAAAGCTGGCTGATTGACCG  
GCAGATTATTATGGGCCGCCACGACGATGAACAGACGCTGCTGCGTGTGGATGAGGCCATCAATAAAACCTATACCCGCCGGA  
ATGGTGCAGAAATGTCGATATCCCGTATCTGCTGGGATACTGGCGGGATTGACCCGACCATGTGTATGAACGCTCGAAAAAA  
CATGGGCTGTTCCGGGTGATCCCATTTAAAGGGGCATCCGTCTACGGAAGCCGGTGGCCAGCATGCCACGTAAGCGAAACAA  
AAACGGGGTTTACCTTACCAGAAATCGGTACGGATAACCGGAAAGAGCAGATTTATAACCGCTTCACACTGACGCCGGAAGGGG  
ATGAACCGCTTCCCGTCCCGTTACCTTCCGAATAACCCGGATATTTTTGATCTG

**2068 nt ssDNA part 2. Template = pEGFP-C1 DNA**

**GGTCA**TTAGTTCATAGCCCATATATGGAGTTCGCGTTACATAAATTACGGTAAATGGCCCGCTGGCTGACCGCCCAACGAC  
CCCCGCCATTGACGTCAATAATGACGTATGTTCCCATAGTAACGCCAATAGGGACTTTCCATTGACGTCAATGGGTGGAGTA  
TTTACGGTAAACTGCCCACTTGGCAGTACATCAAGTGTATCATATGCCAAGTACGCCCCCTATTGACGTCAATGACGGTAAAT  
GGCCCGCTGGCATTATGCCAGTACATGACCTTATGGGACTTTCTACTTGGCAGTACATCTACGTATTAGTCATCGCTATT  
ACCATGGTGTGCGGTTTTGGCAGTACATCAATGGCGTGGATAGCGGTTTGACTCACGGGGATTTCGAAGTCTCCACCCCAT  
TGACGTCAATGGGAGTTTTGTTTTGGCACAAAATCAACGGGACTTTCCAAAATGTCGTAACAACCTCCGCCCATTTGACGCAAA  
TGGCGGTAGGCGTGTACGGTGGGAGTCTATATAAGCAGAGCTGGTTTGTAGTGAACCGTCAGATCCGCTAGCGCTACCGGTCCG  
CCACCATGGTGAGCAAGGGCGAGGAGCTGTTACCCGGGTGGTGCCCATCTGGTTCGAGCTGGACGGCGACGTAAACGGCCAC  
AAGTTCAGCGTGTCCGGCGAGGGCGAGGGCGATGCCACCTACGGCAAGCTGACCCTGAAGTTCATCTGCACCACCGGCAAGCT  
GCCCGTGCCTGGCCACCCTCGTGACCACCCTGACCTACGGCGTGCAGTCTTACGCCGTACCCCGACCATGAAGCAGC  
ACGACTTCTTCAAGTCCGCCATGCCGGAAGGCTACGTCAGGAGCGACCATCTTCTTCAAGGACGACGGCAACTACAAGAC  
CGCGCCGAGGTGAAGTTCAGGGCGACACCCTGGTGAACCGCATCGAGCTGAAGGGCATCGACTGAAGGAGGACGGCAACAT  
CCTGGGCGACAAGCTGAGTACAACCTACAACAGCCACAACGCTCTATATCATGGCCGACAAGCAGAAGAAGCAGGATCAAGGTGA  
ACTTCAAGATCCGCCACAACATCGAGGACGGCAGCGTGCAGCTCGCCGACCCTACCAGCAGAACACCCCCATCGCGCAGCGC  
CCCGTGTGCTGCCCGACAACCACTACCTGAGCACCCAGTCCGCCCTGAGCAAAGACCCCAACGAGAAGCGCGATCACATGGT  
CCTGCTGGAGTTTCGTGACCGCCCGGGATCACTCTCGGCATGGACGAGCTGTACAAGTCCGGACTCAGATCTCGAGCTCAAG  
CTTCGAATTCTGCAGTCGACGGTACCGCGGGCCCGGATCCACCGGATCTAGATAACTGATCATAATCAGCCATACCACATTT  
GTAGAGGTTTTACTTGCTTTAAAAAACCTCCACACCTCCCCCTGAACCTGAAACATAAAAATGAATGCAATTGTTGTTGTTAA  
CTTGTATTATGCAGTTATAATGGTTACAAAATAAAGCAATAGCATCACAAATTTACAAAATAAAGCATTTTTTTTCATGCATT  
CTAGTTGTGTTTTGTCCAAACTCATCAATGTATCTTAAACGCTAAATTTAAGCGTTAATATTTTTGTTAAAAATTCGCGTTAAA  
TTTTTGTAAAATCAGCTCATTTTTTTAACCAATAGGCCGAAAATCGGCAAAAATCCCTTATAAATCAAAAAGAATAGACCGAGATAG  
GGTTGAGTGTGTTCCAGTTTGAACAAGAGTCCACTATTAAGAAGCTGGACTCCAACGTCAAAGGGCGAAAAACCGTCTAT  
CAGGGCGATGGCCACTACGTGAACCATACCCTAATCAAGTTTTTTGGGGTTCGAGGTGCCGTAAAGCACTAAAATCGGAACCC  
TAAAGGGAGCCCCGATTAGAGCTTGACGGGGAAAGCCGGCAACGTGGCGAGAAAGGAAGGGAAGAAAGCGAAAGGAGCGG  
GCGCTAGGGCGCTGGCAAGTGTAGCGGTACGCTGCGCGTAAACCACACCCCGCCGCTTAATGCGCCGCTACA

**Table S16. Staple sequences for the split 62 nm toroid design.**

|                                      |                                       |
|--------------------------------------|---------------------------------------|
| CCGCCAGACCTCGGCGGGTGTTCGGGTGGA       | CAGTAAAGTATTATGACACGCTGTCAATGG        |
| TTACGAAGGTTGCTCAGGGCATGTGTGAAG       | AGTGGTCGCGGGCGCTGCCACGCCCTTCCCTTC     |
| TATGCTCTATAAAGTAGGGCAGCATTTTAAGCTGC  | GGCATTATGAGTAAAAGTCCAGCACTATGG        |
| GAAAGGGCAGTGTTCATTTAACGCCCTTTGTGCGC  | TCAGGTAGTCCCACGTTTATAACCCGATTTAG      |
| CGTTCGTACTCAATAGTTTTCGTTCTCAGTGGGTTT | GTTGTACAGAAATAGTCTTTTCTCAAGTCGATGG    |
| CTCGATGATGGTGAGCGGTGAGGTAATGCGGTT    | TGAGCTGATTTAACA AAAAGCGCCCTTACGGGCAT  |
| AGGTCACACGACTTGTGGTGGGCGAACTAA       | GTGGTGAACATCCCGGCTGCACGGGGTTAT        |
| AACGTCGGTTCGTGCTGGATCGCGCGCGATGA     | TCCTGTGCGTTCGGCCTGCTTTATGACGAGCAGCGAC |
| GCGATCCGCGACAGCAGTTCGCTTTTCATTAGTGA  | CAGGGTGGGCGTGGAGCGCTGTCCAGCAGCCTGT    |
| ACTCAACCTATCTCGTGTCTCGGCCCTTTCACC    | CATTGATGAGTTTGGACACCACATTTCAATTTGTGA  |
| GCCGTTTGAGGCCAAATGCTGGCGGTGGCCCGCT   | CGGATCTTTCCGGGAGATGGCCTATTGGCAATGCGG  |
| GGTATCAGTTTCATCCAGCTGGGCCATCTCACCAGG | GAACCTCGCACCAGAAGAATAATGCATTTACCT     |
| CGACACGGGCAGACTTCAAACCACAACGAAAAAAT  | CTCGCCAGATACTGCGCAGATATACCTGGTATG     |
| TGGGGTCTTTTTACGTCTGTTCAAAC TTGATTA   | TCACTTTTGTACAGAGACAGCTCGCTGGGCA       |
| CCATCCCCATTCTTCTGTGCCCCACAGCCC       | TCACTGGCTTGCCGGTCTTGAGCTCCGTCAT       |
| CAAAAGCATAGCTTCGGGCGGACCTGCCAA       | GGCCGTCGCACTTCAGAGTTTTTTCCGTCGAAAGC   |
| GGGCAGCTGCACGCTCGGCTCAATCTGAACAGTG   | CACCGACTTCTTTGAACGGGCGAGCCAAACCG      |
| CGCCCTAGCGCCCGCTCCAAAGTACAGAGCCACAC  | GTAGCGGAGCCTTCAATGACAATCTAGCAACCC     |
| CGAGAGTGGGGCTGTACCACGGATGTCCACGTT    | GCTTTGATGATATCCCGTCCCAAAAATATCATCAT   |
| CAGATCCCGCCCGGGCTAGGTGGCCAGGC        | GTCCATTTACGTGCGCCCTCTACAACCCATT       |
| CTGCAGAAAAACCAGAGCATAAAAATGATTTATA   | CCAGACCGCTGAAGCAGCGGGTCAAGTAGG        |

TCGCTGGCCTGCCACCCACATAAACGCCGTCGGCAA  
 TTGATGGTTCTCGGCAGCGGCCATAGATCTGCC  
 GGGTGATGGTTCACGTAGGCGGCTGCTTCCCCTTT  
 CGGTGGATGTCTTTTCTCCTCCCCGTAAAAAA  
 TATGGCTGCCAGCTCCCGCGTCTGAATTTTAA  
 TCCCCTTCGGCATAACCATGCACGCGTACCCGGCCC  
 CAAATTTATCGCCGGATCAGTTATCAAGTGG  
 ACCTCCCGGCGCAGCTTCTGGCTGGAATAATCT  
 TCTGCACGGGTGTTGCTAACCATTATGGAATAAC  
 TCTAAATCGGGGGCTCCCAAACGCCGCTTCGCCA  
 CGGTTTTCCAGTTCGGATTTAGGGTTGCCACATC  
 AGGGGAGCCCCTCGAGACGGCTTTCCGCCGCTTTA  
 GCAGGCAAAGCTTGCCCCGCGGTATTGGCAT  
 AGCGAAGCCCGGCGGGAGTTCCAAACAGGTGCCTC  
 CCAGCAGGCCAGTCTTTACGCTTGGCCCTGATA  
 GGTGAGGAAAGCGAGCTCAGGGTGCATGCTG  
 TAACCTGACTGTTTCGATAGACGTTGGAGGACTTTGG  
 TATAGACGTGAGCCAGCGGCTCAAATTTAGCA  
 TGTAGTCGCTGCCCATCGAATTTACGCTCATCCGGC  
 TGCTATTGCAGGGGGAGGTGAACCCCTTGC  
 TCAGGTCTTTATTTGGCTGCAGTTAGAAATGCT  
 ATTCAACGGCGGTCTGTGCTATTCTTTTGGCGGGAT  
 TCCACCACTTCAGCGGAGGACCGCTACCCGGTGCTT  
 GTCCAAACAGTTAAGTGTACCATCAGTTCTTCA  
 CTTTAAATAGTGGACTCTTCAAATGCCGATGTGAA  
 TCATAAAGCCTCATCCCAGCGTCTCTCCAC  
 TGGGAGTCGTGGCGGAGTCGATGGATGCC

AGGGATTTTGCCGATTTAGTAATTAGCACGGGTC  
 GATGGGCTGTACACGCGATAAAGAACCACCGGA  
 GAAGAAGAGAGCCTTCTTCCCCTATTGTTTCATG  
 CAGGGTCCATGAAAACGAATGCCATCATCCGCC  
 GACGGTTTTTCGCCCTTTTATTCACCTGCACCCAG  
 CAAAATATTAACGCTTACCATTTCATGAATGACGCA  
 ATTTTCGCCTGGTTGTGAAGATGGCGGTAT  
 CTGGACGGCAAGTTCACCTCACCAGTCAACATGT  
 AATAAACAAACAATTGCGGGTATTCCCAGC  
 GGTGGTTACGCGCAGCGTCTCTGGCAGGTCCAGC  
 GCTTTATTACCACCCCGGTGTGGGGACCGGT  
 GCCGGTCAATTGGCAGACACTGGCACAAATG  
 CGTTTTTCATACCATGTCTTCATGGAAGCGG  
 CTTTCTCGCCACGTTTCGATACTGGCATCTTTCCG  
 CCAGATAACATTCCGGCATTCAATTCACATAA  
 TTAAAGCACTCGCAGATGGAGGGGGTTAAGATA  
 GCCGTCCACCACGGGGTTTCGTAGCTTCTTCAGT  
 TGCTTTACGGCACCTCGATTTCAGGAAACGTGGTGT  
 TGATGCCGTACGCGCACCAGCGCCGGCGGGTGT  
 GGATGACGATTTCGAAGGGTGCAGGTAACGC  
 CGATGTTGATAACCGCGTGTATCATTGCCAG  
 GGAATATCTCCAGCTTGTCTGTCGTGCGTCA  
 TTTGCCATTCTTGAATCTTGAAGATTTTGG  
 CTCTGCCATCCGATGGGCGGGTCAAACCCC  
 TGAGTCCGTGTGAGGTAATCTGACTGGAACAAC  
 GCCGTGTTTTACGGTTCATCCGGACTGCACCGAC  
 AACGCTTCCGGTTCACGACGCTGCCAAAAC

**Table S17. Primer sequences for the two scaffold strands required to form the split 90 nm Toroid shown in Figure S9. Template was M13mp18 ssDNA. Phosphorothioated nucleotides shown in bold.**

|                              |                                 |
|------------------------------|---------------------------------|
| <b>2952 nt ssDNA part 1:</b> |                                 |
| 2952_part1_Fwd               | <b>GATTAC</b> GAATTCGAGCTCGGTAC |
| 2952_part1_Rev               | CCGGAATAGGTGTATCACC             |
| <b>2952 nt ssDNA part 2:</b> |                                 |
| 2952_part2_Fwd               | <b>GCTATA</b> CTTATATCAACCCTCTC |
| 2952_part2_Rev               | GCCAGCAGCAAATGAAAAAT            |

**Table S18. Primer sequences for the three scaffold strands required to form the split 90 nm Toroid shown in Figure 5c. Template was M13mp18 ssDNA. Phosphorothioated nucleotides shown in bold.**

|                              |                                 |
|------------------------------|---------------------------------|
| <b>1968 nt ssDNA part 1:</b> |                                 |
| 1968_Fwd                     | <b>GATTAC</b> GAATTCGAGCTCGGTAC |
| 1968_Rev                     | AACAAAGCTGCTCATTCAGT            |
| <b>1966 nt ssDNA part 2:</b> |                                 |
| 1966_Fwd                     | <b>ACGTT</b> GATTTGGGTAATGAA    |
| 1966_Rev                     | CAGAAGGAAACCGAGGAAAC            |
| <b>1949 nt ssDNA part 3:</b> |                                 |
| 1949_Fwd                     | <b>GTAAC</b> TTTGTTCGGCTATCTG   |
| 1949_Rev                     | GCCAGCAGCAAATGAAAAAT            |

## Supplemental References

- (1) Veneziano, R., Shepherd, T. R., Ratanalert, S., Bellou, L., Tao, C., and Bathe, M. (2018) In vitro synthesis of gene-length single-stranded DNA. *Sci Rep* 8, 6548.
- (2) Stahl, E., Martin, T. G., Praetorius, F., and Dietz, H. (2014) Facile and scalable preparation of pure and dense DNA origami solutions. *Angew Chem Int Ed Engl* 53, 12735-40.
- (3) Tang, G., Peng, L., Baldwin, P. R., Mann, D. S., Jiang, W., Rees, I., and Ludtke, S. J. (2007) EMAN2: an extensible image processing suite for electron microscopy. *J Struct Biol* 157, 38-46.
